# Supplementary material for: The Influence of Green Marketing on Brand Trust: The Mediation Role of Brand Image and the Moderation Effect of Greenwash
Source: Hindawi journal article supplement (doi:10.1155/2022/6392172), 2022-01-01
Supplement: f1 [file 6392172.f1.pdf]

| 序号 | GS1 | GS2 | GS3 | GS4 | GC1 | GC2 | GC3 | GC4 | GW1 | GW2 | GW3 | GW4 | BV1 | BV2 | BV3 | BV4 | BC1 | BC2 | BC3 | BC4 | BA1 | BA2 | BA3 | BA4 | BT1 | BT2 | BT3 | BT4 |   |
|----|-----|-----|-----|-----|-----|-----|-----|-----|-----|-----|-----|-----|-----|-----|-----|-----|-----|-----|-----|-----|-----|-----|-----|-----|-----|-----|-----|-----|---|
| 1  | 4   | 4   | 3   | 5   | 5   | 4   | 5   | 5   | 2   | 2   | 1   | 3   | 4   | 5   | 5   | 4   | 5   | 5   | 5   | 5   | 4   | 5   | 5   | 4   | 4   | 4   | 4   | 4   |   |
| 2  | 4   | 4   | 4   | 5   | 4   | 4   | 4   | 4   | 1   | 2   | 3   | 3   | 4   | 5   | 5   | 5   | 5   | 4   | 4   | 4   | 4   | 5   | 5   | 5   | 5   | 5   | 5   | 5   |   |
| 3  | 3   | 3   | 3   | 3   | 2   | 2   | 3   | 3   | 4   | 4   | 4   | 4   | 4   | 3   | 3   | 3   | 3   | 3   | 3   | 3   | 3   | 4   | 4   | 4   | 3   | 3   | 3   | 3   |   |
| 4  | 2   | 2   | 3   | 4   | 4   | 2   | 3   | 4   | 4   | 4   | 4   | 4   | 4   | 3   | 3   | 3   | 3   | 4   | 3   | 4   | 3   | 3   | 3   | 3   | 3   | 3   | 3   | 3   |   |
| 5  | 5   | 4   | 3   | 4   | 4   | 3   | 3   | 4   | 5   | 4   | 4   | 3   | 4   | 4   | 4   | 4   | 4   | 4   | 4   | 4   | 4   | 4   | 4   | 4   | 4   | 3   | 3   | 3   |   |
| 6  | 3   | 4   | 3   | 4   | 5   | 5   | 5   | 5   | 2   | 2   | 3   | 2   | 5   | 4   | 4   | 5   | 4   | 5   | 5   | 5   | 5   | 4   | 5   | 5   | 4   | 4   | 5   | 5   |   |
| 7  | 4   | 4   | 4   | 5   | 5   | 3   | 5   | 5   | 1   | 2   | 2   | 3   | 5   | 5   | 5   | 5   | 5   | 5   | 5   | 5   | 5   | 3   | 4   | 4   | 5   | 5   | 5   | 4   |   |
| 8  | 2   | 2   | 2   | 2   | 3   | 3   | 4   | 4   | 1   | 1   | 1   | 1   | 4   | 4   | 4   | 4   | 4   | 4   | 4   | 4   | 4   | 4   | 4   | 4   | 4   | 4   | 4   | 4   |   |
| 9  | 4   | 4   | 5   | 5   | 5   | 5   | 4   | 5   | 1   | 3   | 3   | 4   | 4   | 5   | 5   | 5   | 5   | 5   | 5   | 5   | 5   | 4   | 5   | 5   | 5   | 4   | 4   | 4   |   |
| 10 | 4   | 4   | 2   | 5   | 5   | 4   | 4   | 4   | 3   | 2   | 2   | 1   | 2   | 5   | 5   | 5   | 5   | 2   | 2   | 5   | 2   | 4   | 4   | 4   | 4   | 4   | 4   | 4   |   |
| 11 | 3   | 3   | 3   | 4   | 3   | 3   | 3   | 3   | 2   | 3   | 2   | 1   | 5   | 5   | 4   | 4   | 4   | 4   | 4   | 4   | 4   | 4   | 5   | 5   | 4   | 4   | 4   | 4   |   |
| 12 | 4   | 3   | 3   | 5   | 5   | 5   | 4   | 4   | 2   | 2   | 1   | 3   | 4   | 3   | 4   | 4   | 3   | 4   | 4   | 5   | 5   | 4   | 4   | 4   | 4   | 4   | 4   | 4   |   |
| 13 | 3   | 3   | 3   | 2   | 1   | 5   | 4   | 4   | 4   | 4   | 2   | 2   | 2   | 4   | 3   | 4   | 4   | 4   | 2   | 2   | 4   | 4   | 4   | 3   | 3   | 4   | 4   | 4   |   |
| 14 | 5   | 5   | 5   | 4   | 4   | 4   | 4   | 5   | 1   | 1   | 2   | 1   | 4   | 4   | 5   | 5   | 4   | 4   | 5   | 5   | 5   | 4   | 5   | 5   | 5   | 5   | 5   | 5   |   |
| 15 | 3   | 2   | 3   | 4   | 4   | 4   | 4   | 4   | 2   | 2   | 2   | 3   | 3   | 4   | 4   | 4   | 3   | 3   | 4   | 3   | 3   | 4   | 4   | 4   | 4   | 4   | 3   | 4   |   |
| 16 | 3   | 4   | 3   | 4   | 4   | 3   | 4   | 4   | 4   | 4   | 4   | 4   | 2   | 3   | 4   | 4   | 4   | 4   | 4   | 3   | 3   | 4   | 4   | 4   | 4   | 3   | 3   | 3   |   |
| 17 | 4   | 4   | 4   | 5   | 5   | 5   | 3   | 4   | 1   | 2   | 2   | 3   | 4   | 4   | 4   | 4   | 4   | 4   | 4   | 5   | 3   | 4   | 4   | 4   | 5   | 5   | 5   | 5   |   |
| 18 | 4   | 5   | 5   | 4   | 4   | 5   | 4   | 5   | 4   | 4   | 4   | 4   | 4   | 3   | 4   | 4   | 4   | 4   | 4   | 4   | 3   | 4   | 4   | 4   | 3   | 3   | 4   | 4   |   |
| 19 | 3   | 3   | 3   | 4   | 4   | 4   | 2   | 2   | 5   | 4   | 4   | 3   | 3   | 3   | 3   | 3   | 3   | 3   | 3   | 3   | 3   | 3   | 3   | 3   | 3   | 3   | 3   | 3   |   |
| 20 | 4   | 5   | 4   | 5   | 5   | 5   | 5   | 5   | 4   | 4   | 3   | 5   | 4   | 5   | 4   | 5   | 3   | 3   | 5   | 4   | 4   | 5   | 5   | 5   | 4   | 4   | 3   | 4   |   |
| 21 | 4   | 4   | 4   | 5   | 5   | 5   | 4   | 5   | 3   | 2   | 2   | 1   | 4   | 4   | 4   | 4   | 5   | 5   | 4   | 4   | 4   | 4   | 4   | 4   | 4   | 4   | 4   | 4   |   |
| 22 | 3   | 3   | 5   | 4   | 4   | 5   | 4   | 1   | 1   | 2   | 1   | 4   | 4   | 5   | 5   | 4   | 3   | 4   | 3   | 4   | 5   | 5   | 5   | 4   | 4   | 5   | 5   | 5   |   |
| 23 | 4   | 3   | 4   | 4   | 3   | 3   | 4   | 4   | 5   | 5   | 5   | 5   | 3   | 4   | 4   | 4   | 3   | 4   | 3   | 3   | 4   | 4   | 4   | 4   | 3   | 3   | 3   | 3   |   |
| 24 | 4   | 4   | 4   | 5   | 4   | 5   | 4   | 4   | 1   | 2   | 2   | 3   | 4   | 4   | 4   | 4   | 4   | 4   | 5   | 4   | 4   | 4   | 4   | 4   | 5   | 4   | 4   | 4   |   |
| 25 | 4   | 5   | 3   | 5   | 5   | 5   | 4   | 4   | 2   | 3   | 4   | 5   | 4   | 5   | 4   | 5   | 4   | 5   | 3   | 4   | 5   | 4   | 4   | 4   | 5   | 4   | 5   | 5   |   |
| 26 | 4   | 3   | 3   | 4   | 4   | 4   | 4   | 4   | 1   | 2   | 3   | 2   | 4   | 4   | 4   | 4   | 4   | 4   | 4   | 4   | 4   | 4   | 4   | 4   | 4   | 4   | 4   | 4   |   |
| 27 | 4   | 3   | 4   | 4   | 4   | 5   | 5   | 5   | 3   | 4   | 2   | 3   | 4   | 4   | 3   | 4   | 3   | 3   | 4   | 3   | 4   | 4   | 4   | 4   | 4   | 3   | 3   | 3   |   |
| 28 | 5   | 3   | 4   | 4   | 3   | 4   | 3   | 4   | 5   | 4   | 5   | 4   | 5   | 4   | 3   | 4   | 4   | 3   | 2   | 3   | 4   | 2   | 4   | 5   | 5   | 3   | 3   | 3   |   |
| 29 | 4   | 4   | 4   | 4   | 5   | 3   | 4   | 4   | 2   | 2   | 1   | 3   | 3   | 3   | 4   | 4   | 5   | 4   | 4   | 4   | 4   | 3   | 4   | 4   | 4   | 4   | 4   | 4   |   |
| 30 | 4   | 5   | 5   | 4   | 4   | 4   | 4   | 4   | 1   | 1   | 1   | 1   | 5   | 4   | 4   | 4   | 4   | 5   | 5   | 5   | 3   | 4   | 5   | 5   | 5   | 5   | 5   | 5   |   |
| 31 | 4   | 4   | 3   | 5   | 5   | 4   | 4   | 5   | 1   | 2   | 2   | 3   | 5   | 4   | 5   | 5   | 3   | 2   | 4   | 3   | 4   | 4   | 5   | 5   | 4   | 5   | 4   | 5   |   |
| 32 | 4   | 4   | 4   | 3   | 5   | 3   | 4   | 4   | 3   | 2   | 2   | 2   | 4   | 5   | 4   | 4   | 4   | 4   | 5   | 5   | 4   | 3   | 4   | 3   | 4   | 4   | 4   | 4   |   |
| 33 | 3   | 4   | 4   | 4   | 3   | 4   | 3   | 4   | 1   | 1   | 2   | 1   | 4   | 3   | 4   | 4   | 4   | 4   | 3   | 4   | 3   | 5   | 5   | 3   | 4   | 4   | 4   | 4   |   |
| 34 | 3   | 3   | 3   | 4   | 3   | 3   | 3   | 3   | 1   | 3   | 2   | 2   | 3   | 3   | 3   | 3   | 3   | 3   | 3   | 3   | 3   | 4   | 4   | 4   | 4   | 4   | 4   | 4   |   |
| 35 | 3   | 4   | 4   | 4   | 4   | 3   | 4   | 4   | 2   | 3   | 3   | 3   | 3   | 4   | 4   | 4   | 4   | 4   | 4   | 4   | 3   | 4   | 4   | 4   | 4   | 3   | 4   | 4   |   |
| 36 | 4   | 4   | 4   | 4   | 3   | 2   | 2   | 2   | 5   | 5   | 4   | 4   | 5   | 4   | 4   | 5   | 4   | 3   | 3   | 4   | 4   | 4   | 4   | 4   | 4   | 3   | 3   | 3   | 3 |
| 37 | 4   | 4   | 3   | 3   | 4   | 4   | 3   | 4   | 2   | 2   | 2   | 2   | 3   | 3   | 3   | 3   | 4   | 4   | 3   | 4   | 3   | 4   | 4   | 4   | 4   | 3   | 3   | 4   | 4 |
| 38 | 3   | 3   | 3   | 4   | 2   | 2   | 4   | 4   | 2   | 2   | 2   | 2   | 2   | 2   | 2   | 2   | 2   | 3   | 2   | 3   | 3   | 3   | 3   | 3   | 3   | 3   | 3   | 3   |   |
| 39 | 4   | 3   | 3   | 4   | 4   | 3   | 4   | 4   | 1   | 2   | 2   | 2   | 4   | 4   | 4   | 4   | 5   | 5   | 5   | 4   | 4   | 5   | 5   | 5   | 5   | 5   | 4   | 4   |   |
| 40 | 4   | 4   | 4   | 4   | 5   | 5   | 3   | 4   | 2   | 2   | 1   | 1   | 4   | 3   | 3   | 3   | 4   | 3   | 4   | 4   | 4   | 4   | 4   | 4   | 4   | 4   | 4   | 4   |   |
| 41 | 4   | 3   | 3   | 4   | 4   | 4   | 4   | 5   | 3   | 2   | 2   | 1   | 4   | 4   | 4   | 4   | 4   | 4   | 3   | 3   | 4   | 4   | 4   | 4   | 4   | 4   | 4   | 4   |   |
| 42 | 4   | 4   | 4   | 4   | 4   | 5   | 5   | 5   | 2   | 2   | 1   | 3   | 5   | 5   | 5   | 5   | 4   | 2   | 4   | 4   | 4   | 4   | 4   | 4   | 4   | 4   | 4   | 4   |   |
| 43 | 4   | 2   | 2   | 4   | 4   | 3   | 4   | 4   | 2   | 1   | 1   | 1   | 4   | 4   | 4   | 4   | 4   | 4   | 4   | 4   | 4   | 4   | 4   | 4   | 4   | 4   | 4   | 4   |   |
| 44 | 2   | 2   | 2   | 5   | 4   | 4   | 3   | 4   | 1   | 1   | 1   | 2   | 4   | 4   | 4   | 4   | 4   | 4   | 4   | 4   | 4   | 4   | 4   | 4   | 4   | 4   | 4   | 4   |   |
| 45 | 3   | 3   | 3   | 3   | 4   | 3   | 4   | 3   | 5   | 5   | 5   | 5   | 3   | 4   | 4   | 4   | 3   | 3   | 4   | 4   | 4   | 4   | 4   | 4   | 3   | 3   | 3   | 3   |   |
| 46 | 4   | 4   | 4   | 5   | 5   | 5   | 5   | 5   | 1   | 2   | 2   | 3   | 4   | 4   | 4   | 4   | 4   | 3   | 4   | 3   | 4   | 3   | 4   | 4   | 4   | 4   | 4   | 4   |   |
| 47 | 3   | 3   | 3   | 4   | 2   | 2   | 2   | 5   | 5   | 5   | 5   | 4   | 3   | 3   | 3   | 3   | 2   | 3   | 3   | 2   | 3   | 3   | 3   | 3   | 3   | 3   | 2   | 3   |   |
| 48 | 4   | 4   | 4   | 4   | 4   | 4   | 4   | 4   | 3   | 2   | 2   | 1   | 4   | 4   | 4   | 4   | 4   | 4   | 4   | 4   | 4   | 4   | 4   | 4   | 4   | 4   | 4   | 4   |   |
| 49 | 3   | 3   | 3   | 4   | 3   | 3   | 3   | 3   | 4   | 4   | 4   | 4   | 3   | 3   | 3   | 3   | 3   | 3   | 3   | 3   | 4   | 3   | 3   | 4   | 4   | 3   | 3   | 3   |   |
| 50 | 2   | 2   | 3   | 5   | 4   | 4   | 4   | 4   | 2   | 2   | 2   | 2   | 3   | 3   | 2   | 3   | 3   | 4   | 4   | 4   | 4   | 4   | 4   | 4   | 4   | 3   | 3   | 4   | 4 |
| 51 | 4   | 4   | 3   | 5   | 5   | 4   | 5   | 4   | 4   | 5   | 4   | 3   | 4   | 3   | 4   | 4   | 5   | 4   | 4   | 2   | 3   | 2   | 4   | 4   | 4   | 3   | 4   | 4   |   |
| 52 | 2   | 2   | 3   | 5   | 4   | 4   | 4   | 4   | 2   | 1   | 2   | 3   | 3   | 3   | 3   | 3   | 4   | 3   | 3   | 3   | 3   | 3   | 3   | 3   | 3   | 4   | 4   | 4   |   |
| 53 | 5   | 4   | 4   | 3   | 4   | 2   | 4   | 4   | 5   | 5   | 5   | 5   | 3   | 2   | 3   | 3   | 3   | 2   | 3   | 4   | 3   | 3   | 3   | 3   | 3   | 3   | 3   | 3   |   |
| 54 | 4   | 3   | 3   | 5   | 4   | 4   | 4   | 3   | 1   | 2   | 2   | 2   | 3   | 3   | 3   | 3   | 4   | 4   | 4   | 4   | 3   | 3   | 3   | 3   | 3   | 4   | 4   | 4   |   |
| 55 | 4   | 4   | 3   | 5   | 4   | 4   | 5   | 4   | 4   | 4   | 4   | 4   | 4   | 4   | 4   | 4   | 4   | 4   | 3   | 3   | 3   | 5   | 5   | 4   | 3   | 3   | 4   | 3   |   |
| 56 | 2   | 3   | 3   | 3   | 4   | 2   | 2   | 2   | 2   | 4   | 3   | 3   | 2   | 2   | 2   | 2   | 4   | 4   | 3   | 4   | 3   | 4   | 4   | 4   | 4   | 3   | 3   | 3   |   |
| 57 | 4   | 4   | 5   | 5   | 4   | 4   | 5   | 4   | 1   | 2   | 2   | 2   | 5   | 4   | 4   | 4   | 4   | 4   | 4   | 5   | 5   | 5   | 5   | 4   | 4   | 4   | 5   | 4   |   |
| 58 | 3   | 3   | 4   | 4   | 3   | 4   | 3   | 4   | 4   | 5   | 3   | 4   | 4   | 3   | 3   | 3   | 4   | 4   | 4   | 3   | 3   | 3   | 3   | 3   | 3   | 3   | 3   | 3   |   |
| 59 | 4   | 3   | 3   | 4   | 4   | 3   | 4   | 1   | 2   | 2   | 3   | 3   | 2   | 3   | 3   | 2   | 3   | 4   | 4   | 3   | 4   | 4   | 4   | 4   | 4   | 4   | 3   | 4   |   |
| 60 | 4   | 4   | 4   | 2   | 3   | 3   | 3   | 3   | 2   | 2   | 1   | 3   | 4   | 4   | 4   | 4   | 4   | 4   | 4   | 4   | 4   | 4   | 4   | 4   | 4   | 4   | 4   | 4   |   |
| 61 | 5   | 5   | 5   | 5   | 5   | 5   | 5   | 4   | 1   | 1   | 1   | 2   | 3   | 3   | 4   | 4   | 4   | 5   | 5   | 5   | 3   | 3   | 4   | 4   | 4   | 4   | 4   | 5   |   |
| 62 | 4   | 3   | 3   | 4   | 5   | 5   | 4   | 5   | 1   | 2   | 1   | 1   | 4   | 4   | 5   | 5   | 5   | 5   | 5   | 5   | 4   | 4   | 4   | 5   | 5   | 5   | 5   | 5   |   |
| 63 | 5   | 4   | 4   | 5   | 5   | 5   | 5   | 5   | 3   | 4   | 3   | 3   | 5   | 4   | 5   | 5   | 5   | 5   | 4   | 5   | 5   | 5   | 5   | 5   | 4   | 4   | 5   | 5   |   |
| 64 | 5   | 5   | 2   | 5   | 5   | 5   | 5   | 5   | 1   | 1   | 1   | 1   | 4   | 5   | 5   | 5   | 5   | 5   | 4   | 5   | 5   | 3   | 5   | 5   | 5   | 4   | 4   | 4   |   |
| 65 | 1   | 2   | 2   | 1   | 1   | 1   | 1   | 1   | 2   | 2   | 2   | 2   | 2   | 3   | 2   | 2   | 2   | 3   | 3   | 2   | 2   | 3   | 4   | 4   | 2   | 2   | 2   | 2   |   |
| 66 | 4   | 5   | 5   | 4   | 4   | 4   | 4   | 4   | 2   | 2   | 2   | 2   | 4   | 5   | 5   | 5   | 5   | 5   | 4   | 5   | 5   | 5   | 5   | 5   | 4   | 5   | 4   | 5   |   |
| 67 | 4   | 3   | 3   | 5   | 3   | 3   | 4   | 4   | 2   | 2   | 3   | 3   | 4   | 4   | 4   | 4   | 3   | 3   | 3   | 3   | 4   | 4   | 4   | 4   | 4   | 3   | 4   | 4   |   |
| 68 | 3   | 2   | 2   | 4   | 3   | 3   | 3   | 3   | 2   | 2   | 2   | 2   | 4   | 3   | 3   | 4   | 4   | 4   | 3   | 3   | 4   | 4   | 4   | 4   |     |     |     |     |   |

|     |   |   |   |   |   |   |   |   |   |   |   |   |   |   |   |   |   |   |   |   |   |   |   |   |   |   |   |   |
|-----|---|---|---|---|---|---|---|---|---|---|---|---|---|---|---|---|---|---|---|---|---|---|---|---|---|---|---|---|
| 69  | 2 | 2 | 2 | 2 | 3 | 3 | 4 | 2 | 1 | 1 | 1 | 1 | 5 | 5 | 5 | 5 | 4 | 2 | 3 | 3 | 5 | 5 | 5 | 5 | 4 | 4 | 4 | 4 |
| 70  | 3 | 3 | 3 | 4 | 4 | 4 | 4 | 4 | 2 | 2 | 2 | 2 | 3 | 4 | 3 | 4 | 3 | 4 | 3 | 4 | 3 | 4 | 4 | 4 | 4 | 3 | 3 | 3 |
| 71  | 5 | 5 | 5 | 5 | 3 | 3 | 3 | 3 | 1 | 1 | 1 | 1 | 5 | 5 | 5 | 5 | 4 | 4 | 4 | 4 | 5 | 5 | 5 | 5 | 5 | 5 | 5 | 5 |
| 72  | 5 | 5 | 5 | 5 | 4 | 4 | 4 | 4 | 1 | 1 | 1 | 1 | 3 | 3 | 3 | 3 | 5 | 5 | 5 | 5 | 5 | 5 | 5 | 5 | 5 | 5 | 5 | 5 |
| 73  | 5 | 5 | 5 | 5 | 4 | 4 | 4 | 4 | 1 | 1 | 1 | 1 | 5 | 5 | 5 | 5 | 4 | 4 | 4 | 4 | 5 | 5 | 5 | 5 | 5 | 5 | 5 | 5 |
| 74  | 2 | 2 | 2 | 2 | 3 | 3 | 3 | 3 | 1 | 1 | 1 | 1 | 3 | 3 | 3 | 3 | 4 | 2 | 3 | 3 | 5 | 5 | 5 | 5 | 4 | 4 | 4 | 4 |
| 75  | 5 | 5 | 5 | 5 | 5 | 5 | 5 | 5 | 2 | 1 | 1 | 1 | 5 | 5 | 5 | 5 | 5 | 5 | 5 | 5 | 5 | 5 | 5 | 5 | 5 | 5 | 5 | 5 |
| 76  | 4 | 4 | 5 | 3 | 2 | 2 | 2 | 2 | 2 | 3 | 2 | 5 | 4 | 4 | 4 | 4 | 5 | 5 | 3 | 4 | 4 | 3 | 5 | 4 | 4 | 5 | 5 | 5 |
| 77  | 5 | 5 | 5 | 5 | 4 | 4 | 4 | 4 | 2 | 2 | 2 | 2 | 5 | 5 | 5 | 5 | 5 | 5 | 5 | 5 | 4 | 4 | 4 | 4 | 4 | 4 | 4 | 4 |
| 78  | 1 | 1 | 1 | 1 | 1 | 2 | 1 | 2 | 1 | 1 | 1 | 1 | 5 | 5 | 5 | 5 | 3 | 3 | 3 | 3 | 5 | 4 | 5 | 4 | 4 | 4 | 4 | 4 |
| 79  | 4 | 4 | 4 | 4 | 5 | 5 | 5 | 5 | 2 | 1 | 1 | 1 | 4 | 4 | 4 | 4 | 5 | 5 | 5 | 5 | 5 | 5 | 5 | 5 | 4 | 4 | 4 | 4 |
| 80  | 4 | 3 | 3 | 4 | 3 | 3 | 2 | 2 | 2 | 3 | 3 | 3 | 4 | 4 | 4 | 4 | 3 | 4 | 3 | 4 | 4 | 4 | 4 | 4 | 4 | 3 | 4 | 4 |
| 81  | 5 | 5 | 5 | 5 | 5 | 5 | 5 | 5 | 1 | 1 | 1 | 1 | 5 | 5 | 5 | 5 | 5 | 5 | 5 | 5 | 5 | 5 | 5 | 5 | 5 | 5 | 5 | 5 |
| 82  | 4 | 4 | 4 | 5 | 4 | 4 | 4 | 4 | 1 | 2 | 2 | 3 | 4 | 4 | 4 | 4 | 5 | 5 | 5 | 5 | 4 | 4 | 4 | 4 | 5 | 5 | 5 | 5 |
| 83  | 5 | 5 | 5 | 5 | 4 | 4 | 4 | 4 | 1 | 1 | 1 | 1 | 4 | 4 | 4 | 4 | 5 | 5 | 5 | 5 | 4 | 4 | 4 | 4 | 5 | 5 | 5 | 5 |
| 84  | 4 | 4 | 4 | 4 | 4 | 4 | 3 | 5 | 4 | 4 | 4 | 4 | 4 | 4 | 4 | 4 | 4 | 3 | 3 | 4 | 3 | 3 | 3 | 3 | 3 | 3 | 3 | 3 |
| 85  | 4 | 4 | 4 | 4 | 5 | 4 | 5 | 4 | 3 | 3 | 5 | 5 | 2 | 2 | 2 | 2 | 2 | 2 | 3 | 1 | 2 | 2 | 2 | 2 | 2 | 2 | 2 | 2 |
| 86  | 5 | 5 | 5 | 5 | 5 | 5 | 5 | 5 | 3 | 2 | 2 | 1 | 4 | 4 | 4 | 4 | 5 | 5 | 5 | 5 | 4 | 4 | 4 | 4 | 5 | 5 | 5 | 5 |
| 87  | 4 | 4 | 4 | 4 | 5 | 4 | 4 | 5 | 1 | 1 | 1 | 1 | 4 | 4 | 4 | 5 | 5 | 5 | 5 | 5 | 4 | 4 | 4 | 4 | 4 | 4 | 4 | 4 |
| 88  | 4 | 4 | 4 | 5 | 5 | 5 | 5 | 5 | 2 | 1 | 1 | 1 | 4 | 5 | 5 | 5 | 5 | 5 | 5 | 5 | 4 | 4 | 4 | 4 | 5 | 5 | 5 | 5 |
| 89  | 5 | 5 | 5 | 5 | 5 | 5 | 5 | 5 | 2 | 2 | 1 | 3 | 5 | 5 | 5 | 5 | 5 | 5 | 5 | 5 | 4 | 4 | 4 | 4 | 5 | 5 | 5 | 5 |
| 90  | 5 | 5 | 5 | 5 | 3 | 3 | 3 | 3 | 1 | 2 | 3 | 2 | 5 | 5 | 5 | 5 | 5 | 5 | 5 | 5 | 5 | 5 | 5 | 5 | 4 | 4 | 4 | 4 |
| 91  | 5 | 5 | 5 | 5 | 4 | 4 | 4 | 4 | 1 | 1 | 1 | 1 | 5 | 5 | 5 | 5 | 5 | 4 | 4 | 4 | 5 | 5 | 5 | 5 | 5 | 5 | 5 | 5 |
| 92  | 5 | 5 | 5 | 5 | 5 | 5 | 5 | 5 | 5 | 5 | 5 | 5 | 2 | 2 | 2 | 2 | 2 | 2 | 2 | 2 | 2 | 2 | 2 | 2 | 2 | 2 | 2 | 2 |
| 93  | 5 | 5 | 5 | 5 | 5 | 5 | 5 | 5 | 2 | 2 | 2 | 2 | 3 | 3 | 3 | 3 | 5 | 5 | 5 | 5 | 4 | 4 | 4 | 4 | 5 | 5 | 5 | 5 |
| 94  | 1 | 1 | 1 | 1 | 2 | 2 | 1 | 1 | 1 | 1 | 1 | 1 | 2 | 2 | 2 | 2 | 2 | 2 | 2 | 2 | 3 | 3 | 3 | 3 | 3 | 3 | 3 | 3 |
| 95  | 4 | 4 | 4 | 4 | 4 | 4 | 4 | 4 | 1 | 1 | 1 | 1 | 4 | 4 | 4 | 5 | 5 | 5 | 5 | 5 | 4 | 4 | 4 | 4 | 5 | 5 | 5 | 5 |
| 96  | 3 | 3 | 3 | 3 | 3 | 3 | 3 | 3 | 4 | 4 | 4 | 4 | 4 | 3 | 3 | 4 | 3 | 3 | 3 | 3 | 3 | 3 | 3 | 4 | 4 | 3 | 3 | 3 |
| 97  | 3 | 3 | 3 | 4 | 4 | 5 | 3 | 4 | 2 | 2 | 2 | 3 | 4 | 5 | 4 | 5 | 5 | 4 | 5 | 4 | 4 | 4 | 4 | 4 | 4 | 4 | 5 | 5 |
| 98  | 2 | 3 | 3 | 5 | 2 | 2 | 2 | 2 | 2 | 3 | 2 | 1 | 3 | 4 | 3 | 4 | 2 | 3 | 3 | 2 | 3 | 3 | 3 | 3 | 2 | 3 | 2 | 2 |
| 99  | 4 | 4 | 4 | 5 | 4 | 4 | 4 | 4 | 2 | 2 | 2 | 2 | 4 | 4 | 4 | 4 | 5 | 5 | 5 | 5 | 4 | 4 | 4 | 4 | 4 | 4 | 4 | 4 |
| 100 | 5 | 5 | 5 | 5 | 5 | 5 | 5 | 5 | 1 | 1 | 1 | 1 | 5 | 5 | 5 | 5 | 5 | 5 | 5 | 5 | 5 | 5 | 5 | 5 | 5 | 5 | 5 | 5 |
| 101 | 5 | 5 | 5 | 5 | 4 | 4 | 4 | 4 | 4 | 4 | 4 | 4 | 4 | 4 | 4 | 4 | 4 | 4 | 4 | 4 | 4 | 4 | 4 | 4 | 5 | 5 | 5 | 5 |
| 102 | 4 | 4 | 4 | 4 | 5 | 5 | 5 | 5 | 2 | 2 | 2 | 2 | 4 | 4 | 4 | 4 | 3 | 3 | 3 | 3 | 4 | 4 | 4 | 4 | 5 | 5 | 5 | 5 |
| 103 | 4 | 4 | 4 | 4 | 4 | 4 | 4 | 4 | 5 | 5 | 5 | 5 | 5 | 5 | 5 | 5 | 3 | 1 | 3 | 3 | 1 | 1 | 1 | 1 | 1 | 1 | 1 | 1 |
| 104 | 4 | 4 | 4 | 4 | 4 | 5 | 4 | 4 | 4 | 5 | 5 | 5 | 2 | 5 | 2 | 2 | 1 | 2 | 1 | 2 | 2 | 2 | 2 | 2 | 1 | 1 | 1 | 1 |
| 105 | 5 | 5 | 5 | 5 | 4 | 4 | 4 | 4 | 5 | 5 | 5 | 5 | 3 | 3 | 3 | 3 | 1 | 1 | 1 | 1 | 2 | 2 | 2 | 2 | 1 | 1 | 1 | 1 |
| 106 | 4 | 3 | 3 | 5 | 3 | 3 | 3 | 3 | 3 | 3 | 3 | 3 | 2 | 4 | 4 | 4 | 4 | 4 | 4 | 4 | 4 | 4 | 4 | 4 | 4 | 4 | 4 | 4 |
| 107 | 4 | 3 | 3 | 4 | 4 | 4 | 3 | 3 | 2 | 2 | 2 | 2 | 3 | 4 | 4 | 4 | 3 | 2 | 3 | 3 | 4 | 4 | 4 | 4 | 3 | 3 | 3 | 3 |
| 108 | 5 | 5 | 5 | 5 | 5 | 5 | 4 | 4 | 4 | 3 | 4 | 5 | 5 | 5 | 5 | 5 | 4 | 4 | 3 | 3 | 3 | 3 | 3 | 3 | 2 | 3 | 3 | 3 |
| 109 | 4 | 3 | 3 | 4 | 4 | 4 | 4 | 4 | 2 | 2 | 2 | 2 | 4 | 4 | 3 | 4 | 4 | 3 | 3 | 4 | 4 | 4 | 4 | 4 | 4 | 3 | 4 | 4 |
| 110 | 3 | 3 | 4 | 4 | 4 | 4 | 4 | 4 | 1 | 2 | 2 | 2 | 3 | 4 | 4 | 4 | 4 | 4 | 4 | 3 | 3 | 4 | 4 | 4 | 4 | 4 | 4 | 4 |
| 111 | 4 | 4 | 4 | 4 | 3 | 3 | 3 | 3 | 1 | 2 | 2 | 3 | 4 | 4 | 4 | 4 | 4 | 4 | 5 | 5 | 4 | 5 | 5 | 4 | 4 | 4 | 4 | 4 |
| 112 | 3 | 2 | 2 | 3 | 3 | 3 | 3 | 3 | 1 | 2 | 3 | 2 | 3 | 3 | 3 | 3 | 2 | 2 | 3 | 2 | 3 | 3 | 3 | 3 | 2 | 2 | 3 | 3 |
| 113 | 2 | 2 | 2 | 4 | 2 | 2 | 3 | 3 | 1 | 1 | 1 | 1 | 5 | 4 | 4 | 5 | 4 | 4 | 4 | 4 | 4 | 4 | 4 | 4 | 4 | 4 | 4 | 4 |
| 114 | 4 | 4 | 4 | 4 | 4 | 4 | 4 | 4 | 4 | 4 | 4 | 4 | 4 | 4 | 4 | 5 | 4 | 5 | 3 | 3 | 3 | 4 | 4 | 4 | 4 | 4 | 3 | 3 |
| 115 | 4 | 3 | 3 | 5 | 4 | 4 | 4 | 4 | 1 | 2 | 2 | 5 | 4 | 4 | 4 | 4 | 4 | 4 | 3 | 3 | 5 | 4 | 4 | 5 | 4 | 4 | 4 | 4 |
| 116 | 1 | 1 | 2 | 1 | 2 | 2 | 2 | 2 | 3 | 2 | 2 | 1 | 1 | 1 | 1 | 2 | 2 | 3 | 3 | 1 | 1 | 1 | 1 | 1 | 1 | 1 | 2 | 1 |
| 117 | 2 | 1 | 2 | 1 | 2 | 2 | 2 | 2 | 3 | 1 | 1 | 1 | 2 | 2 | 1 | 1 | 1 | 2 | 1 | 1 | 1 | 2 | 2 | 1 | 2 | 1 | 2 | 1 |
| 118 | 1 | 2 | 1 | 2 | 2 | 2 | 2 | 2 | 3 | 2 | 2 | 1 | 1 | 2 | 1 | 1 | 2 | 1 | 1 | 2 | 2 | 1 | 1 | 2 | 2 | 1 | 1 | 1 |
| 119 | 1 | 1 | 1 | 2 | 1 | 1 | 1 | 1 | 1 | 1 | 1 | 1 | 1 | 1 | 2 | 1 | 2 | 2 | 3 | 1 | 2 | 2 | 1 | 2 | 1 | 1 | 1 | 1 |
| 120 | 2 | 1 | 2 | 2 | 1 | 1 | 1 | 1 | 3 | 2 | 1 | 2 | 1 | 1 | 1 | 2 | 2 | 2 | 1 | 1 | 2 | 2 | 1 | 2 | 1 | 1 | 1 | 1 |
| 121 | 1 | 2 | 1 | 1 | 1 | 1 | 1 | 1 | 2 | 2 | 2 | 2 | 1 | 1 | 2 | 1 | 2 | 2 | 2 | 3 | 1 | 1 | 1 | 1 | 2 | 1 | 2 | 2 |
| 122 | 2 | 1 | 2 | 1 | 2 | 2 | 2 | 2 | 2 | 1 | 1 | 1 | 2 | 2 | 1 | 2 | 1 | 2 | 2 | 1 | 1 | 1 | 1 | 2 | 2 | 1 | 1 | 2 |
| 123 | 1 | 1 | 1 | 2 | 1 | 1 | 1 | 1 | 1 | 1 | 1 | 1 | 2 | 2 | 1 | 1 | 1 | 1 | 1 | 1 | 1 | 1 | 1 | 2 | 1 | 1 | 1 | 1 |
| 124 | 1 | 1 | 2 | 1 | 1 | 2 | 3 | 2 | 1 | 1 | 2 | 1 | 2 | 2 | 1 | 1 | 2 | 4 | 2 | 2 | 1 | 1 | 2 | 2 | 2 | 2 | 1 | 1 |
| 125 | 2 | 2 | 3 | 2 | 1 | 1 | 2 | 1 | 3 | 3 | 3 | 3 | 1 | 2 | 2 | 1 | 3 | 2 | 2 | 1 | 1 | 1 | 2 | 1 | 1 | 1 | 1 | 1 |
| 126 | 2 | 2 | 2 | 3 | 3 | 3 | 3 | 3 | 3 | 3 | 3 | 3 | 2 | 2 | 1 | 2 | 1 | 2 | 2 | 1 | 1 | 1 | 2 | 1 | 1 | 1 | 2 | 2 |
| 127 | 3 | 3 | 2 | 3 | 3 | 3 | 3 | 3 | 3 | 3 | 3 | 3 | 2 | 2 | 1 | 1 | 3 | 4 | 3 | 3 | 1 | 1 | 1 | 1 | 1 | 2 | 2 | 2 |
| 128 | 2 | 2 | 2 | 3 | 1 | 1 | 1 | 1 | 2 | 2 | 2 | 2 | 2 | 1 | 1 | 1 | 4 | 2 | 4 | 4 | 1 | 1 | 2 | 2 | 3 | 1 | 2 | 2 |
| 129 | 3 | 2 | 2 | 2 | 2 | 2 | 2 | 2 | 2 | 2 | 2 | 2 | 2 | 1 | 1 | 1 | 3 | 3 | 4 | 3 | 2 | 1 | 1 | 2 | 3 | 3 | 2 | 2 |
| 130 | 2 | 3 | 2 | 2 | 2 | 2 | 2 | 2 | 3 | 1 | 1 | 3 | 2 | 1 | 2 | 2 | 3 | 3 | 3 | 3 | 2 | 1 | 1 | 2 | 3 | 2 | 2 | 3 |
| 131 | 3 | 3 | 3 | 3 | 3 | 3 | 3 | 3 | 4 | 4 | 4 | 4 | 2 | 2 | 1 | 2 | 2 | 3 | 2 | 2 | 2 | 1 | 1 | 2 | 3 | 3 | 3 | 3 |
| 132 | 3 | 3 | 3 | 3 | 3 | 3 | 3 | 3 | 2 | 2 | 2 | 2 | 3 | 2 | 1 | 1 | 3 | 3 | 3 | 3 | 1 | 1 | 1 | 1 | 3 | 3 | 3 | 3 |
| 133 | 3 | 2 | 3 | 3 | 2 | 3 | 2 | 3 | 3 | 3 | 3 | 3 | 1 | 2 | 2 | 1 | 1 | 2 | 3 | 3 | 3 | 2 | 1 | 1 | 2 | 3 | 3 | 3 |
| 134 | 3 | 3 | 3 | 3 | 4 | 4 | 4 | 4 | 5 | 5 | 5 | 5 | 1 | 1 | 1 | 1 | 3 | 3 | 3 | 3 | 1 | 1 | 2 | 1 | 3 | 3 | 3 | 2 |
| 135 | 3 | 4 | 3 | 3 | 4 | 4 | 4 | 4 | 3 | 5 | 5 | 5 | 5 | 5 | 5 | 2 | 1 | 2 | 3 | 3 | 3 | 3 | 1 | 2 | 3 | 3 | 3 | 2 |
| 136 | 3 | 3 | 3 | 3 | 4 | 2 | 2 | 4 | 5 | 5 | 5 | 5 | 2 | 3 | 3 | 3 | 3 | 3 | 3 | 3 | 2 | 3 | 1 | 3 | 3 | 3 | 2 | 3 |
| 137 | 3 | 3 | 4 | 3 | 4 | 4 | 2 | 2 | 5 | 5 | 5 | 5 | 3 | 2 | 2 | 2 | 3 | 5 | 3 | 3 | 1 | 2 | 1 |   |   |   |   |   |

|     |   |   |   |   |   |   |   |   |   |   |   |   |   |   |   |   |   |   |   |   |   |   |   |   |   |   |   |
|-----|---|---|---|---|---|---|---|---|---|---|---|---|---|---|---|---|---|---|---|---|---|---|---|---|---|---|---|
| 138 | 3 | 4 | 3 | 3 | 2 | 2 | 2 | 2 | 5 | 4 | 4 | 4 | 3 | 3 | 2 | 2 | 2 | 2 | 4 | 1 | 1 | 1 | 1 | 3 | 3 | 2 | 2 |
| 139 | 3 | 4 | 3 | 3 | 4 | 4 | 4 | 4 | 1 | 1 | 1 | 1 | 3 | 2 | 2 | 3 | 5 | 5 | 5 | 5 | 1 | 1 | 1 | 1 | 4 | 4 | 4 |
| 140 | 3 | 4 | 3 | 3 | 2 | 4 | 2 | 4 | 5 | 5 | 5 | 5 | 3 | 2 | 2 | 2 | 1 | 2 | 2 | 3 | 2 | 1 | 2 | 2 | 3 | 2 | 2 |
| 141 | 3 | 4 | 3 | 3 | 4 | 2 | 2 | 4 | 5 | 5 | 5 | 5 | 3 | 2 | 2 | 2 | 3 | 3 | 3 | 2 | 3 | 3 | 3 | 3 | 3 | 3 | 2 |
| 142 | 4 | 3 | 4 | 3 | 4 | 2 | 4 | 2 | 1 | 2 | 2 | 3 | 3 | 2 | 3 | 2 | 4 | 2 | 2 | 2 | 1 | 1 | 1 | 3 | 3 | 2 | 2 |
| 143 | 3 | 3 | 3 | 4 | 4 | 4 | 4 | 4 | 1 | 1 | 1 | 1 | 2 | 3 | 2 | 2 | 4 | 4 | 4 | 3 | 3 | 3 | 3 | 4 | 4 | 3 | 4 |
| 144 | 4 | 3 | 3 | 3 | 4 | 4 | 4 | 4 | 2 | 2 | 1 | 3 | 3 | 2 | 2 | 3 | 3 | 3 | 3 | 2 | 2 | 2 | 3 | 4 | 4 | 3 | 4 |
| 145 | 3 | 3 | 3 | 3 | 4 | 4 | 4 | 4 | 1 | 2 | 2 | 3 | 3 | 2 | 2 | 2 | 2 | 3 | 3 | 3 | 3 | 2 | 3 | 4 | 4 | 3 | 4 |
| 146 | 4 | 3 | 3 | 3 | 4 | 4 | 4 | 4 | 3 | 2 | 2 | 1 | 2 | 3 | 3 | 3 | 3 | 3 | 3 | 3 | 3 | 2 | 3 | 4 | 4 | 3 | 4 |
| 147 | 3 | 3 | 3 | 4 | 2 | 4 | 4 | 2 | 4 | 4 | 4 | 4 | 2 | 3 | 3 | 3 | 3 | 3 | 3 | 3 | 2 | 2 | 2 | 3 | 3 | 3 | 3 |
| 148 | 4 | 3 | 4 | 3 | 2 | 2 | 3 | 3 | 4 | 5 | 4 | 3 | 3 | 3 | 3 | 3 | 3 | 3 | 3 | 3 | 2 | 3 | 2 | 3 | 3 | 3 | 3 |
| 149 | 4 | 3 | 3 | 4 | 4 | 4 | 4 | 4 | 3 | 3 | 3 | 3 | 3 | 3 | 3 | 3 | 3 | 3 | 3 | 2 | 2 | 2 | 3 | 3 | 4 | 3 | 3 |
| 150 | 4 | 3 | 4 | 3 | 4 | 4 | 4 | 4 | 3 | 3 | 3 | 3 | 3 | 2 | 2 | 3 | 3 | 3 | 3 | 2 | 3 | 2 | 2 | 3 | 4 | 3 | 3 |
| 151 | 3 | 4 | 3 | 4 | 4 | 4 | 4 | 4 | 3 | 3 | 3 | 3 | 3 | 3 | 3 | 2 | 3 | 3 | 3 | 3 | 2 | 3 | 2 | 3 | 4 | 3 | 3 |
| 152 | 4 | 3 | 3 | 4 | 4 | 3 | 3 | 4 | 3 | 3 | 3 | 3 | 3 | 3 | 3 | 2 | 3 | 4 | 3 | 3 | 2 | 3 | 2 | 3 | 4 | 3 | 3 |
| 153 | 3 | 4 | 3 | 4 | 3 | 4 | 4 | 5 | 3 | 3 | 3 | 3 | 3 | 3 | 3 | 2 | 3 | 4 | 3 | 3 | 2 | 3 | 2 | 3 | 4 | 3 | 3 |
| 154 | 3 | 4 | 3 | 3 | 3 | 4 | 2 | 3 | 3 | 3 | 3 | 3 | 3 | 3 | 3 | 3 | 4 | 3 | 3 | 3 | 2 | 3 | 3 | 3 | 4 | 3 | 3 |
| 155 | 3 | 3 | 4 | 4 | 4 | 2 | 2 | 4 | 3 | 3 | 3 | 3 | 3 | 3 | 3 | 2 | 4 | 4 | 4 | 3 | 2 | 3 | 3 | 3 | 4 | 4 | 4 |
| 156 | 4 | 3 | 4 | 3 | 4 | 2 | 4 | 4 | 3 | 3 | 3 | 3 | 3 | 3 | 3 | 2 | 2 | 3 | 2 | 3 | 2 | 2 | 3 | 4 | 3 | 3 | 4 |
| 157 | 3 | 4 | 3 | 4 | 4 | 4 | 2 | 4 | 3 | 3 | 3 | 3 | 3 | 3 | 3 | 2 | 3 | 3 | 3 | 4 | 3 | 3 | 2 | 3 | 4 | 4 | 3 |
| 158 | 3 | 3 | 4 | 4 | 1 | 2 | 3 | 2 | 4 | 4 | 4 | 4 | 3 | 3 | 3 | 2 | 3 | 3 | 3 | 3 | 3 | 2 | 2 | 2 | 3 | 3 | 3 |
| 159 | 4 | 3 | 3 | 4 | 3 | 3 | 3 | 2 | 3 | 2 | 2 | 2 | 3 | 3 | 4 | 3 | 3 | 3 | 3 | 3 | 3 | 2 | 2 | 4 | 4 | 4 | 4 |
| 160 | 4 | 4 | 3 | 3 | 3 | 3 | 3 | 3 | 2 | 2 | 2 | 3 | 3 | 3 | 4 | 3 | 3 | 3 | 3 | 3 | 3 | 2 | 2 | 3 | 4 | 4 | 4 |
| 161 | 4 | 4 | 3 | 3 | 5 | 5 | 5 | 5 | 2 | 2 | 2 | 3 | 3 | 3 | 4 | 3 | 5 | 5 | 5 | 5 | 3 | 3 | 2 | 2 | 5 | 5 | 5 |
| 162 | 4 | 3 | 3 | 4 | 3 | 3 | 3 | 4 | 4 | 4 | 4 | 4 | 3 | 3 | 4 | 3 | 3 | 3 | 3 | 3 | 3 | 2 | 2 | 3 | 3 | 3 | 3 |
| 163 | 4 | 3 | 3 | 4 | 3 | 2 | 3 | 2 | 4 | 4 | 4 | 4 | 3 | 3 | 4 | 3 | 3 | 3 | 3 | 3 | 3 | 3 | 2 | 3 | 3 | 3 | 3 |
| 164 | 3 | 4 | 4 | 3 | 4 | 4 | 4 | 4 | 2 | 2 | 2 | 2 | 3 | 3 | 4 | 3 | 3 | 3 | 3 | 3 | 2 | 3 | 2 | 2 | 3 | 3 | 4 |
| 165 | 4 | 3 | 3 | 4 | 3 | 3 | 3 | 5 | 5 | 5 | 5 | 5 | 3 | 3 | 4 | 3 | 3 | 3 | 3 | 5 | 3 | 2 | 2 | 3 | 3 | 3 | 3 |
| 166 | 4 | 3 | 4 | 3 | 5 | 5 | 3 | 3 | 2 | 2 | 2 | 2 | 3 | 3 | 4 | 3 | 2 | 3 | 3 | 3 | 4 | 3 | 3 | 3 | 4 | 4 | 4 |
| 167 | 4 | 4 | 3 | 3 | 3 | 3 | 3 | 3 | 4 | 4 | 4 | 4 | 3 | 3 | 4 | 3 | 3 | 3 | 3 | 3 | 3 | 4 | 3 | 3 | 3 | 3 | 3 |
| 168 | 4 | 3 | 4 | 3 | 4 | 2 | 3 | 3 | 4 | 4 | 4 | 4 | 3 | 3 | 4 | 3 | 3 | 3 | 3 | 3 | 3 | 4 | 4 | 4 | 3 | 3 | 3 |
| 169 | 3 | 4 | 4 | 3 | 3 | 3 | 3 | 3 | 2 | 2 | 2 | 2 | 3 | 3 | 5 | 3 | 3 | 3 | 3 | 3 | 3 | 4 | 4 | 3 | 4 | 3 | 4 |
| 170 | 4 | 3 | 3 | 4 | 3 | 3 | 3 | 3 | 4 | 4 | 4 | 4 | 3 | 3 | 5 | 3 | 3 | 3 | 3 | 3 | 3 | 3 | 4 | 3 | 3 | 3 | 3 |
| 171 | 4 | 3 | 4 | 3 | 3 | 3 | 3 | 3 | 2 | 2 | 2 | 2 | 4 | 3 | 3 | 3 | 3 | 3 | 3 | 3 | 4 | 3 | 4 | 3 | 4 | 4 | 4 |
| 172 | 4 | 3 | 3 | 4 | 3 | 3 | 3 | 3 | 2 | 2 | 2 | 2 | 3 | 3 | 5 | 3 | 3 | 3 | 3 | 3 | 3 | 4 | 4 | 3 | 4 | 3 | 4 |
| 173 | 3 | 4 | 3 | 4 | 3 | 3 | 3 | 3 | 2 | 2 | 2 | 2 | 4 | 3 | 3 | 3 | 3 | 3 | 3 | 3 | 4 | 3 | 3 | 3 | 3 | 3 | 3 |
| 174 | 4 | 3 | 4 | 3 | 4 | 4 | 4 | 4 | 2 | 2 | 2 | 1 | 3 | 3 | 5 | 3 | 4 | 4 | 4 | 3 | 4 | 3 | 4 | 3 | 4 | 4 | 4 |
| 175 | 3 | 4 | 3 | 4 | 4 | 4 | 4 | 2 | 3 | 3 | 3 | 3 | 3 | 3 | 5 | 3 | 3 | 5 | 3 | 3 | 4 | 3 | 3 | 3 | 4 | 3 | 4 |
| 176 | 4 | 3 | 4 | 3 | 4 | 4 | 4 | 4 | 2 | 2 | 1 | 3 | 4 | 4 | 2 | 4 | 3 | 3 | 3 | 3 | 3 | 4 | 3 | 3 | 3 | 3 | 5 |
| 177 | 4 | 4 | 3 | 3 | 3 | 3 | 3 | 3 | 2 | 4 | 3 | 3 | 3 | 4 | 4 | 4 | 3 | 4 | 3 | 3 | 3 | 3 | 4 | 3 | 4 | 3 | 4 |
| 178 | 3 | 4 | 4 | 3 | 3 | 3 | 3 | 3 | 1 | 2 | 2 | 3 | 4 | 4 | 3 | 4 | 4 | 4 | 4 | 4 | 4 | 4 | 3 | 3 | 4 | 3 | 4 |
| 179 | 4 | 3 | 4 | 3 | 3 | 3 | 3 | 5 | 1 | 1 | 1 | 2 | 4 | 4 | 4 | 3 | 5 | 5 | 5 | 5 | 3 | 3 | 4 | 3 | 4 | 4 | 4 |
| 180 | 3 | 4 | 3 | 4 | 4 | 4 | 4 | 4 | 3 | 2 | 2 | 1 | 4 | 4 | 3 | 4 | 3 | 4 | 3 | 3 | 4 | 3 | 3 | 3 | 4 | 3 | 4 |
| 181 | 3 | 4 | 4 | 3 | 4 | 4 | 4 | 4 | 1 | 1 | 1 | 1 | 4 | 4 | 3 | 4 | 4 | 3 | 4 | 4 | 3 | 4 | 3 | 4 | 5 | 3 | 5 |
| 182 | 4 | 4 | 3 | 3 | 4 | 4 | 4 | 4 | 2 | 2 | 1 | 3 | 4 | 4 | 3 | 4 | 4 | 4 | 4 | 4 | 4 | 4 | 3 | 4 | 4 | 3 | 4 |
| 183 | 4 | 3 | 3 | 4 | 4 | 4 | 4 | 4 | 1 | 1 | 1 | 1 | 4 | 4 | 3 | 4 | 4 | 4 | 4 | 4 | 4 | 3 | 3 | 3 | 4 | 4 | 4 |
| 184 | 4 | 3 | 3 | 4 | 4 | 4 | 4 | 4 | 1 | 1 | 1 | 1 | 4 | 3 | 4 | 4 | 4 | 4 | 4 | 4 | 4 | 3 | 3 | 3 | 5 | 4 | 5 |
| 185 | 4 | 3 | 3 | 4 | 4 | 4 | 4 | 4 | 1 | 1 | 1 | 1 | 4 | 4 | 3 | 4 | 4 | 4 | 4 | 4 | 4 | 3 | 4 | 3 | 4 | 5 | 4 |
| 186 | 3 | 3 | 4 | 4 | 4 | 4 | 4 | 4 | 1 | 1 | 1 | 1 | 4 | 4 | 3 | 4 | 5 | 5 | 5 | 5 | 3 | 4 | 3 | 4 | 4 | 4 | 4 |
| 187 | 3 | 4 | 3 | 3 | 4 | 4 | 2 | 2 | 3 | 2 | 2 | 1 | 4 | 4 | 3 | 4 | 3 | 3 | 3 | 3 | 4 | 3 | 3 | 3 | 4 | 4 | 4 |
| 188 | 4 | 3 | 3 | 3 | 4 | 4 | 4 | 5 | 2 | 1 | 1 | 1 | 5 | 4 | 3 | 3 | 3 | 3 | 3 | 3 | 3 | 4 | 3 | 4 | 4 | 4 | 4 |
| 189 | 4 | 4 | 3 | 4 | 3 | 4 | 3 | 4 | 3 | 3 | 3 | 3 | 4 | 5 | 3 | 3 | 3 | 3 | 3 | 3 | 4 | 3 | 4 | 3 | 3 | 4 | 3 |
| 190 | 4 | 4 | 3 | 4 | 2 | 2 | 4 | 4 | 3 | 3 | 3 | 3 | 5 | 5 | 5 | 5 | 3 | 3 | 3 | 3 | 3 | 4 | 3 | 4 | 3 | 3 | 4 |
| 191 | 4 | 4 | 3 | 4 | 3 | 3 | 3 | 3 | 2 | 1 | 1 | 1 | 4 | 4 | 4 | 4 | 3 | 3 | 3 | 4 | 4 | 3 | 4 | 3 | 4 | 5 | 4 |
| 192 | 4 | 4 | 4 | 3 | 3 | 3 | 3 | 3 | 2 | 1 | 1 | 1 | 4 | 4 | 4 | 4 | 3 | 3 | 3 | 5 | 4 | 3 | 3 | 3 | 4 | 5 | 4 |
| 193 | 4 | 3 | 4 | 4 | 3 | 3 | 3 | 3 | 1 | 2 | 1 | 1 | 4 | 4 | 4 | 4 | 4 | 4 | 4 | 4 | 3 | 4 | 3 | 4 | 4 | 5 | 4 |
| 194 | 3 | 4 | 4 | 4 | 3 | 3 | 3 | 3 | 3 | 3 | 3 | 3 | 4 | 4 | 4 | 4 | 3 | 3 | 3 | 3 | 3 | 3 | 3 | 3 | 4 | 5 | 3 |
| 195 | 4 | 3 | 4 | 4 | 3 | 3 | 3 | 3 | 1 | 1 | 1 | 1 | 4 | 4 | 4 | 4 | 4 | 4 | 4 | 4 | 4 | 3 | 4 | 3 | 4 | 5 | 4 |
| 196 | 4 | 3 | 4 | 4 | 3 | 3 | 3 | 3 | 1 | 1 | 1 | 1 | 4 | 4 | 4 | 4 | 4 | 4 | 4 | 4 | 4 | 3 | 3 | 3 | 4 | 5 | 4 |
| 197 | 4 | 3 | 4 | 4 | 5 | 5 | 5 | 3 | 1 | 1 | 1 | 1 | 4 | 4 | 4 | 4 | 4 | 4 | 4 | 4 | 3 | 4 | 3 | 5 | 5 | 5 | 5 |
| 198 | 4 | 4 | 3 | 4 | 4 | 5 | 5 | 5 | 1 | 1 | 2 | 1 | 4 | 4 | 4 | 4 | 4 | 4 | 4 | 4 | 4 | 3 | 4 | 3 | 5 | 5 | 5 |
| 199 | 4 | 4 | 3 | 4 | 5 | 5 | 5 | 3 | 1 | 1 | 1 | 1 | 4 | 4 | 4 | 4 | 4 | 4 | 4 | 4 | 3 | 3 | 4 | 3 | 5 | 5 | 5 |
| 200 | 4 | 4 | 3 | 4 | 3 | 3 | 3 | 3 | 2 | 4 | 2 | 2 | 4 | 5 | 5 | 5 | 4 | 4 | 4 | 4 | 3 | 3 | 3 | 3 | 4 | 3 | 4 |
| 201 | 4 | 4 | 3 | 4 | 3 | 3 | 3 | 3 | 2 | 2 | 2 | 3 | 4 | 4 | 4 | 4 | 4 | 4 | 4 | 4 | 3 | 3 | 3 | 3 | 4 | 3 | 4 |
| 202 | 3 | 4 | 4 | 4 | 3 | 3 | 3 | 3 | 5 | 5 | 5 | 5 | 4 | 4 | 4 | 4 | 4 | 4 | 4 | 4 | 3 | 3 | 4 | 3 | 3 | 3 | 3 |
| 203 | 3 | 4 | 4 | 4 | 3 | 3 | 3 | 3 | 2 | 2 | 2 | 2 | 4 | 4 | 4 | 4 | 4 | 4 | 4 | 4 | 3 | 4 | 3 | 3 | 4 | 4 | 4 |
| 204 | 4 | 4 | 4 | 3 | 3 | 3 | 3 | 3 | 2 | 2 | 2 | 2 | 4 | 4 | 4 | 4 | 4 | 4 | 4 | 4 | 4 | 4 | 4 | 4 | 3 | 4 | 4 |
| 205 | 4 | 3 | 4 | 4 | 3 | 3 | 3 | 3 | 4 | 4 | 4 | 4 | 4 | 4 | 4 | 4 | 4 | 4 | 4 | 4 | 3 | 3 | 4 | 3 | 4 | 3 | 4 |
| 206 | 4 | 4 | 3 | 4 | 3 | 3 | 3 | 3 | 2 | 2 | 2 | 2 | 4 | 4 | 4 | 4 | 4 | 4 | 4 | 4 | 3 | 3 | 3 | 4 | 4 | 3 | 5 |

|     |   |   |   |   |   |   |   |   |   |   |   |   |   |   |   |   |   |   |   |   |   |   |   |   |   |   |
|-----|---|---|---|---|---|---|---|---|---|---|---|---|---|---|---|---|---|---|---|---|---|---|---|---|---|---|
| 207 | 4 | 4 | 3 | 4 | 3 | 3 | 3 | 3 | 4 | 4 | 4 | 4 | 4 | 4 | 4 | 4 | 4 | 4 | 3 | 3 | 4 | 4 | 4 | 3 | 4 | 4 |
| 208 | 4 | 4 | 4 | 3 | 3 | 3 | 3 | 3 | 2 | 2 | 2 | 2 | 4 | 4 | 5 | 5 | 4 | 4 | 4 | 3 | 3 | 4 | 4 | 4 | 4 | 4 |
| 209 | 3 | 3 | 3 | 4 | 3 | 3 | 3 | 3 | 2 | 2 | 2 | 2 | 4 | 4 | 4 | 4 | 3 | 4 | 3 | 3 | 3 | 4 | 3 | 4 | 3 | 4 |
| 210 | 3 | 4 | 4 | 4 | 3 | 3 | 3 | 3 | 2 | 4 | 3 | 3 | 4 | 4 | 4 | 4 | 5 | 3 | 5 | 5 | 4 | 3 | 4 | 4 | 3 | 4 |
| 211 | 4 | 4 | 3 | 4 | 3 | 3 | 3 | 3 | 2 | 2 | 2 | 2 | 4 | 4 | 4 | 4 | 5 | 4 | 5 | 4 | 4 | 4 | 4 | 4 | 3 | 4 |
| 212 | 4 | 3 | 4 | 4 | 5 | 5 | 5 | 5 | 2 | 2 | 2 | 2 | 4 | 4 | 4 | 4 | 5 | 4 | 5 | 5 | 3 | 4 | 4 | 4 | 5 | 5 |
| 213 | 4 | 4 | 3 | 4 | 4 | 4 | 4 | 3 | 4 | 4 | 4 | 4 | 4 | 4 | 4 | 4 | 4 | 3 | 3 | 4 | 3 | 4 | 3 | 4 | 3 | 4 |
| 214 | 4 | 4 | 3 | 4 | 4 | 4 | 4 | 3 | 2 | 3 | 3 | 4 | 4 | 4 | 4 | 4 | 4 | 3 | 3 | 4 | 4 | 4 | 4 | 4 | 3 | 4 |
| 215 | 3 | 4 | 4 | 4 | 4 | 4 | 3 | 4 | 2 | 2 | 2 | 2 | 4 | 4 | 4 | 4 | 5 | 4 | 5 | 5 | 4 | 4 | 4 | 4 | 4 | 4 |
| 216 | 4 | 4 | 4 | 3 | 4 | 4 | 4 | 3 | 2 | 2 | 2 | 2 | 4 | 4 | 4 | 4 | 5 | 4 | 5 | 5 | 4 | 4 | 4 | 4 | 4 | 4 |
| 217 | 4 | 3 | 4 | 4 | 4 | 4 | 4 | 3 | 2 | 2 | 2 | 2 | 4 | 5 | 3 | 3 | 5 | 4 | 5 | 5 | 4 | 4 | 4 | 4 | 4 | 4 |
| 218 | 4 | 4 | 3 | 4 | 4 | 4 | 4 | 4 | 2 | 2 | 2 | 2 | 4 | 4 | 4 | 4 | 5 | 5 | 5 | 5 | 5 | 5 | 5 | 4 | 4 | 4 |
| 219 | 4 | 4 | 3 | 4 | 4 | 4 | 4 | 4 | 2 | 3 | 3 | 4 | 4 | 4 | 4 | 4 | 3 | 3 | 3 | 3 | 4 | 4 | 3 | 4 | 4 | 3 |
| 220 | 4 | 4 | 4 | 3 | 4 | 4 | 4 | 4 | 2 | 2 | 2 | 2 | 4 | 4 | 4 | 4 | 3 | 3 | 3 | 3 | 5 | 4 | 3 | 4 | 4 | 3 |
| 221 | 4 | 4 | 4 | 3 | 4 | 4 | 4 | 4 | 2 | 2 | 2 | 2 | 4 | 4 | 4 | 4 | 4 | 3 | 4 | 4 | 4 | 4 | 4 | 3 | 4 | 4 |
| 222 | 4 | 4 | 3 | 4 | 4 | 4 | 4 | 4 | 2 | 2 | 2 | 2 | 4 | 4 | 4 | 4 | 3 | 5 | 3 | 3 | 3 | 4 | 4 | 4 | 3 | 3 |
| 223 | 3 | 3 | 4 | 3 | 4 | 4 | 4 | 4 | 2 | 2 | 2 | 2 | 4 | 4 | 4 | 4 | 4 | 4 | 4 | 4 | 4 | 4 | 3 | 4 | 4 | 3 |
| 224 | 4 | 4 | 3 | 4 | 4 | 4 | 4 | 4 | 2 | 3 | 3 | 4 | 4 | 4 | 4 | 4 | 4 | 4 | 4 | 4 | 4 | 4 | 3 | 3 | 4 | 3 |
| 225 | 4 | 4 | 3 | 4 | 4 | 4 | 4 | 4 | 3 | 2 | 3 | 4 | 4 | 4 | 4 | 4 | 4 | 4 | 4 | 4 | 4 | 3 | 4 | 3 | 4 | 3 |
| 226 | 4 | 4 | 4 | 3 | 4 | 4 | 4 | 4 | 4 | 4 | 4 | 4 | 5 | 5 | 5 | 5 | 4 | 4 | 4 | 4 | 3 | 4 | 4 | 4 | 4 | 3 |
| 227 | 3 | 4 | 4 | 4 | 4 | 4 | 4 | 4 | 2 | 3 | 3 | 4 | 5 | 5 | 5 | 5 | 5 | 3 | 5 | 4 | 4 | 3 | 3 | 3 | 4 | 3 |
| 228 | 4 | 4 | 4 | 3 | 4 | 4 | 4 | 4 | 2 | 4 | 3 | 3 | 4 | 4 | 4 | 4 | 4 | 5 | 4 | 4 | 5 | 4 | 3 | 4 | 4 | 3 |
| 229 | 4 | 4 | 3 | 4 | 4 | 4 | 4 | 4 | 2 | 3 | 3 | 4 | 4 | 4 | 4 | 4 | 3 | 3 | 4 | 4 | 4 | 3 | 4 | 3 | 4 | 3 |
| 230 | 4 | 3 | 4 | 4 | 4 | 4 | 4 | 4 | 1 | 1 | 1 | 2 | 4 | 4 | 4 | 4 | 5 | 4 | 5 | 4 | 4 | 3 | 4 | 3 | 4 | 3 |
| 231 | 4 | 4 | 3 | 4 | 4 | 4 | 4 | 4 | 1 | 1 | 1 | 1 | 4 | 4 | 4 | 4 | 5 | 5 | 5 | 5 | 4 | 4 | 4 | 4 | 4 | 4 |
| 232 | 4 | 4 | 3 | 4 | 4 | 4 | 4 | 4 | 1 | 1 | 1 | 1 | 4 | 4 | 4 | 4 | 5 | 5 | 5 | 5 | 3 | 3 | 3 | 3 | 5 | 5 |
| 233 | 3 | 4 | 4 | 4 | 4 | 4 | 4 | 4 | 1 | 1 | 1 | 1 | 4 | 3 | 5 | 4 | 5 | 5 | 5 | 4 | 3 | 4 | 3 | 4 | 5 | 5 |
| 234 | 4 | 4 | 4 | 3 | 4 | 4 | 4 | 4 | 2 | 1 | 1 | 1 | 4 | 4 | 4 | 4 | 4 | 4 | 4 | 4 | 3 | 4 | 3 | 4 | 5 | 5 |
| 235 | 4 | 4 | 3 | 4 | 4 | 4 | 4 | 4 | 1 | 2 | 2 | 3 | 4 | 4 | 4 | 4 | 5 | 3 | 5 | 5 | 4 | 4 | 3 | 4 | 5 | 5 |
| 236 | 4 | 3 | 4 | 4 | 4 | 4 | 4 | 4 | 1 | 1 | 1 | 1 | 4 | 4 | 4 | 4 | 5 | 4 | 5 | 4 | 4 | 4 | 3 | 4 | 3 | 4 |
| 237 | 4 | 3 | 4 | 4 | 4 | 4 | 4 | 4 | 2 | 1 | 1 | 1 | 4 | 4 | 4 | 4 | 3 | 3 | 3 | 5 | 4 | 3 | 3 | 3 | 4 | 3 |
| 238 | 4 | 4 | 4 | 3 | 4 | 4 | 4 | 4 | 1 | 2 | 1 | 1 | 4 | 4 | 4 | 4 | 4 | 4 | 4 | 4 | 3 | 4 | 3 | 4 | 4 | 3 |
| 239 | 4 | 4 | 3 | 4 | 4 | 4 | 4 | 4 | 1 | 1 | 1 | 1 | 4 | 4 | 4 | 4 | 4 | 4 | 4 | 4 | 3 | 4 | 3 | 4 | 5 | 5 |
| 240 | 4 | 4 | 4 | 3 | 4 | 4 | 4 | 4 | 1 | 1 | 1 | 1 | 4 | 4 | 4 | 4 | 2 | 4 | 2 | 2 | 4 | 4 | 3 | 3 | 5 | 3 |
| 241 | 4 | 4 | 3 | 4 | 4 | 4 | 4 | 4 | 1 | 1 | 1 | 1 | 4 | 4 | 4 | 4 | 3 | 3 | 4 | 4 | 4 | 4 | 4 | 4 | 5 | 4 |
| 242 | 3 | 4 | 4 | 3 | 4 | 4 | 4 | 4 | 3 | 3 | 3 | 3 | 4 | 4 | 4 | 4 | 3 | 3 | 3 | 3 | 4 | 3 | 4 | 3 | 4 | 3 |
| 243 | 4 | 4 | 4 | 4 | 4 | 4 | 4 | 4 | 3 | 2 | 2 | 1 | 4 | 4 | 4 | 4 | 3 | 3 | 3 | 3 | 4 | 3 | 4 | 3 | 5 | 3 |
| 244 | 3 | 4 | 4 | 4 | 4 | 4 | 4 | 4 | 3 | 3 | 3 | 3 | 4 | 4 | 4 | 4 | 3 | 3 | 3 | 3 | 3 | 4 | 4 | 3 | 5 | 4 |
| 245 | 4 | 4 | 4 | 4 | 4 | 4 | 4 | 4 | 1 | 1 | 1 | 1 | 4 | 4 | 4 | 4 | 3 | 5 | 3 | 3 | 3 | 4 | 4 | 4 | 3 | 3 |
| 246 | 4 | 4 | 4 | 4 | 4 | 4 | 4 | 4 | 1 | 1 | 1 | 1 | 4 | 4 | 4 | 4 | 4 | 4 | 4 | 3 | 3 | 3 | 5 | 3 | 4 | 4 |
| 247 | 4 | 4 | 4 | 4 | 4 | 4 | 4 | 4 | 2 | 1 | 1 | 1 | 4 | 4 | 4 | 4 | 4 | 4 | 4 | 4 | 4 | 3 | 4 | 3 | 4 | 4 |
| 248 | 4 | 4 | 4 | 4 | 4 | 4 | 4 | 4 | 2 | 1 | 1 | 1 | 4 | 4 | 4 | 4 | 4 | 4 | 4 | 4 | 5 | 3 | 4 | 3 | 4 | 4 |
| 249 | 4 | 3 | 4 | 4 | 4 | 4 | 4 | 4 | 2 | 2 | 2 | 2 | 4 | 4 | 4 | 4 | 4 | 4 | 4 | 4 | 4 | 3 | 4 | 4 | 4 | 4 |
| 250 | 3 | 3 | 4 | 4 | 4 | 4 | 4 | 4 | 2 | 2 | 2 | 2 | 4 | 4 | 4 | 4 | 4 | 4 | 4 | 4 | 3 | 3 | 5 | 3 | 4 | 4 |
| 251 | 4 | 4 | 4 | 4 | 4 | 4 | 4 | 4 | 2 | 2 | 2 | 2 | 4 | 4 | 4 | 4 | 4 | 4 | 4 | 4 | 5 | 4 | 3 | 4 | 5 | 4 |
| 252 | 3 | 4 | 4 | 3 | 4 | 4 | 4 | 4 | 2 | 2 | 2 | 2 | 4 | 4 | 4 | 4 | 4 | 4 | 4 | 4 | 4 | 3 | 4 | 3 | 4 | 4 |
| 253 | 4 | 4 | 4 | 4 | 4 | 4 | 4 | 4 | 1 | 1 | 1 | 1 | 4 | 4 | 4 | 4 | 4 | 4 | 4 | 4 | 4 | 3 | 4 | 3 | 4 | 4 |
| 254 | 3 | 4 | 3 | 4 | 4 | 4 | 4 | 4 | 2 | 2 | 2 | 2 | 4 | 4 | 4 | 4 | 4 | 4 | 4 | 4 | 4 | 3 | 4 | 3 | 5 | 4 |
| 255 | 4 | 4 | 4 | 4 | 4 | 5 | 5 | 5 | 2 | 2 | 2 | 2 | 4 | 4 | 4 | 4 | 4 | 4 | 4 | 4 | 4 | 3 | 4 | 5 | 4 | 5 |
| 256 | 4 | 4 | 4 | 4 | 4 | 4 | 4 | 4 | 2 | 2 | 2 | 2 | 4 | 4 | 4 | 4 | 4 | 4 | 4 | 4 | 4 | 4 | 4 | 4 | 5 | 4 |
| 257 | 4 | 3 | 4 | 3 | 4 | 4 | 4 | 4 | 1 | 1 | 1 | 1 | 4 | 4 | 4 | 4 | 5 | 3 | 5 | 4 | 3 | 4 | 4 | 4 | 5 | 5 |
| 258 | 4 | 4 | 4 | 4 | 4 | 4 | 4 | 4 | 2 | 2 | 2 | 2 | 4 | 4 | 4 | 4 | 4 | 5 | 4 | 4 | 3 | 4 | 4 | 4 | 5 | 4 |
| 259 | 4 | 4 | 4 | 4 | 4 | 5 | 5 | 5 | 1 | 1 | 2 | 1 | 4 | 4 | 4 | 4 | 5 | 4 | 5 | 5 | 3 | 4 | 4 | 4 | 5 | 5 |
| 260 | 4 | 4 | 3 | 5 | 4 | 4 | 4 | 4 | 2 | 2 | 2 | 2 | 4 | 4 | 4 | 4 | 5 | 4 | 5 | 5 | 4 | 3 | 4 | 3 | 4 | 4 |
| 261 | 4 | 3 | 5 | 4 | 4 | 4 | 4 | 4 | 3 | 2 | 2 | 2 | 4 | 4 | 4 | 4 | 5 | 5 | 5 | 5 | 3 | 4 | 3 | 4 | 5 | 5 |
| 262 | 4 | 4 | 4 | 4 | 4 | 4 | 4 | 4 | 2 | 2 | 2 | 2 | 5 | 4 | 4 | 3 | 5 | 5 | 5 | 5 | 5 | 3 | 4 | 3 | 4 | 4 |
| 263 | 4 | 4 | 4 | 4 | 4 | 4 | 4 | 4 | 2 | 2 | 2 | 2 | 4 | 4 | 4 | 4 | 5 | 4 | 5 | 5 | 4 | 4 | 4 | 3 | 4 | 4 |
| 264 | 4 | 4 | 4 | 4 | 4 | 4 | 4 | 4 | 2 | 2 | 2 | 2 | 4 | 4 | 4 | 4 | 5 | 5 | 5 | 5 | 4 | 4 | 4 | 4 | 5 | 4 |
| 265 | 4 | 4 | 4 | 4 | 5 | 5 | 5 | 4 | 1 | 1 | 1 | 1 | 4 | 4 | 4 | 4 | 4 | 4 | 4 | 4 | 4 | 4 | 4 | 4 | 5 | 5 |
| 266 | 4 | 4 | 4 | 4 | 4 | 5 | 5 | 4 | 2 | 2 | 2 | 2 | 4 | 4 | 4 | 4 | 4 | 4 | 4 | 4 | 4 | 4 | 4 | 4 | 5 | 4 |
| 267 | 4 | 4 | 4 | 4 | 4 | 4 | 4 | 4 | 2 | 2 | 2 | 2 | 4 | 4 | 4 | 4 | 4 | 4 | 4 | 4 | 4 | 4 | 4 | 4 | 5 | 3 |
| 268 | 5 | 4 | 3 | 4 | 4 | 4 | 4 | 4 | 2 | 2 | 2 | 2 | 4 | 4 | 4 | 4 | 4 | 4 | 4 | 4 | 4 | 4 | 4 | 4 | 4 | 4 |
| 269 | 4 | 4 | 4 | 4 | 4 | 4 | 4 | 4 | 2 | 2 | 2 | 2 | 4 | 4 | 4 | 4 | 4 | 4 | 4 | 4 | 4 | 4 | 4 | 4 | 4 | 4 |
| 270 | 3 | 5 | 4 | 4 | 4 | 4 | 4 | 4 | 2 | 2 | 2 | 2 | 4 | 4 | 4 | 4 | 4 | 4 | 4 | 4 | 3 | 4 | 4 | 3 | 4 | 4 |
| 271 | 4 | 4 | 4 | 4 | 4 | 4 | 4 | 4 | 2 | 2 | 2 | 1 | 4 | 4 | 4 | 4 | 4 | 5 | 4 | 4 | 3 | 4 | 4 | 4 | 4 | 4 |
| 272 | 3 | 5 | 4 | 4 | 4 | 4 | 4 | 4 | 1 | 1 | 1 | 2 | 4 | 4 | 4 | 4 | 5 | 4 | 5 | 5 | 4 | 3 | 4 | 3 | 4 | 4 |
| 273 | 4 | 4 | 4 | 4 | 4 | 4 | 4 | 4 | 5 | 1 | 1 | 2 | 4 | 4 | 4 | 4 | 5 | 4 | 5 | 5 | 4 | 5 | 4 | 5 | 4 | 4 |
| 274 | 4 | 4 | 4 | 4 | 4 | 4 | 4 | 5 | 1 | 1 | 1 | 1 | 4 | 4 | 4 | 4 | 5 | 4 | 5 | 5 | 4 | 4 | 4 | 4 | 5 | 4 |
| 275 | 5 | 3 | 4 | 4 | 4 | 4 | 4 | 5 | 1 | 1 | 1 | 1 | 3 | 4 | 5 | 4 | 5 | 5 | 5 | 5 | 3 | 4 | 5 | 4 | 4 | 4 |

|     |   |   |   |   |   |   |   |   |   |   |   |   |   |   |   |   |   |   |   |   |   |   |   |   |   |   |   |   |   |
|-----|---|---|---|---|---|---|---|---|---|---|---|---|---|---|---|---|---|---|---|---|---|---|---|---|---|---|---|---|---|
| 276 | 4 | 4 | 4 | 4 | 4 | 4 | 4 | 5 | 1 | 1 | 1 | 1 | 4 | 4 | 4 | 4 | 5 | 5 | 5 | 5 | 4 | 4 | 4 | 3 | 5 | 5 | 5 | 5 |   |
| 277 | 4 | 4 | 4 | 4 | 4 | 4 | 4 | 5 | 1 | 1 | 1 | 1 | 4 | 5 | 3 | 3 | 5 | 5 | 5 | 5 | 3 | 4 | 3 | 4 | 4 | 4 | 4 | 4 |   |
| 278 | 3 | 4 | 5 | 4 | 4 | 4 | 4 | 5 | 1 | 1 | 1 | 1 | 5 | 3 | 5 | 3 | 3 | 3 | 3 | 3 | 4 | 3 | 4 | 4 | 4 | 4 | 4 | 4 |   |
| 279 | 3 | 5 | 4 | 4 | 5 | 5 | 4 | 4 | 1 | 1 | 1 | 1 | 4 | 4 | 4 | 4 | 3 | 3 | 3 | 3 | 5 | 4 | 3 | 4 | 4 | 4 | 4 | 4 |   |
| 280 | 4 | 4 | 4 | 4 | 5 | 5 | 5 | 4 | 1 | 1 | 1 | 1 | 4 | 4 | 4 | 4 | 3 | 3 | 3 | 4 | 4 | 5 | 5 | 4 | 4 | 4 | 4 | 4 |   |
| 281 | 4 | 4 | 4 | 4 | 5 | 4 | 5 | 5 | 1 | 1 | 1 | 1 | 4 | 4 | 4 | 4 | 3 | 5 | 3 | 3 | 3 | 4 | 4 | 4 | 4 | 4 | 4 | 4 |   |
| 282 | 4 | 4 | 4 | 4 | 5 | 5 | 5 | 4 | 1 | 1 | 1 | 1 | 4 | 4 | 4 | 4 | 4 | 4 | 4 | 4 | 3 | 4 | 4 | 4 | 4 | 4 | 4 | 4 |   |
| 283 | 4 | 4 | 4 | 4 | 5 | 5 | 5 | 4 | 1 | 1 | 1 | 1 | 4 | 4 | 4 | 4 | 4 | 4 | 4 | 4 | 4 | 4 | 4 | 4 | 4 | 4 | 4 | 4 |   |
| 284 | 4 | 4 | 4 | 4 | 5 | 5 | 5 | 4 | 1 | 2 | 1 | 1 | 4 | 4 | 4 | 4 | 4 | 4 | 4 | 4 | 5 | 4 | 4 | 4 | 5 | 5 | 5 | 5 |   |
| 285 | 4 | 4 | 4 | 4 | 5 | 5 | 5 | 4 | 2 | 2 | 1 | 3 | 5 | 5 | 3 | 3 | 4 | 4 | 4 | 4 | 4 | 3 | 4 | 3 | 5 | 5 | 5 | 5 |   |
| 286 | 4 | 5 | 3 | 4 | 5 | 5 | 5 | 5 | 2 | 1 | 1 | 1 | 4 | 4 | 4 | 4 | 4 | 4 | 4 | 4 | 4 | 3 | 3 | 3 | 5 | 5 | 5 | 5 |   |
| 287 | 4 | 4 | 5 | 4 | 5 | 5 | 5 | 5 | 1 | 1 | 1 | 1 | 4 | 4 | 4 | 4 | 4 | 4 | 4 | 4 | 3 | 3 | 4 | 3 | 5 | 5 | 5 | 5 |   |
| 288 | 4 | 5 | 4 | 4 | 5 | 5 | 5 | 5 | 1 | 1 | 1 | 1 | 4 | 4 | 4 | 4 | 4 | 4 | 4 | 5 | 5 | 4 | 5 | 4 | 5 | 5 | 5 | 5 |   |
| 289 | 4 | 5 | 4 | 4 | 5 | 5 | 5 | 5 | 2 | 1 | 1 | 1 | 4 | 4 | 4 | 4 | 5 | 3 | 5 | 5 | 4 | 3 | 4 | 3 | 5 | 5 | 5 | 5 |   |
| 290 | 4 | 5 | 4 | 4 | 5 | 5 | 5 | 5 | 1 | 1 | 1 | 1 | 4 | 4 | 4 | 4 | 5 | 5 | 5 | 5 | 4 | 4 | 3 | 4 | 5 | 5 | 5 | 5 |   |
| 291 | 4 | 4 | 5 | 4 | 5 | 5 | 5 | 5 | 1 | 1 | 1 | 1 | 4 | 4 | 4 | 4 | 4 | 4 | 4 | 4 | 5 | 4 | 4 | 4 | 5 | 5 | 5 | 5 |   |
| 292 | 4 | 4 | 5 | 4 | 5 | 5 | 5 | 5 | 1 | 2 | 1 | 1 | 4 | 4 | 4 | 4 | 5 | 5 | 5 | 5 | 4 | 4 | 5 | 4 | 5 | 5 | 5 | 5 |   |
| 293 | 4 | 5 | 4 | 4 | 5 | 5 | 5 | 5 | 1 | 1 | 2 | 1 | 4 | 4 | 4 | 4 | 5 | 5 | 5 | 5 | 5 | 4 | 3 | 4 | 5 | 5 | 5 | 5 |   |
| 294 | 4 | 4 | 5 | 4 | 5 | 5 | 5 | 5 | 2 | 1 | 1 | 1 | 4 | 4 | 4 | 4 | 3 | 3 | 3 | 3 | 4 | 4 | 4 | 4 | 5 | 5 | 5 | 5 |   |
| 295 | 4 | 5 | 4 | 4 | 5 | 4 | 4 | 3 | 3 | 3 | 3 | 3 | 4 | 4 | 4 | 4 | 3 | 3 | 3 | 3 | 5 | 3 | 4 | 3 | 4 | 4 | 4 | 4 |   |
| 296 | 5 | 5 | 3 | 4 | 5 | 5 | 5 | 5 | 1 | 1 | 1 | 1 | 4 | 4 | 4 | 4 | 4 | 4 | 4 | 4 | 4 | 4 | 4 | 4 | 5 | 5 | 5 | 5 |   |
| 297 | 4 | 5 | 4 | 4 | 5 | 5 | 5 | 5 | 1 | 2 | 1 | 1 | 4 | 4 | 4 | 4 | 4 | 4 | 4 | 4 | 4 | 5 | 4 | 5 | 5 | 5 | 5 | 5 |   |
| 298 | 4 | 5 | 4 | 4 | 5 | 5 | 5 | 5 | 1 | 1 | 1 | 1 | 4 | 4 | 4 | 4 | 4 | 4 | 4 | 4 | 4 | 4 | 5 | 4 | 5 | 5 | 5 | 5 |   |
| 299 | 4 | 4 | 5 | 4 | 5 | 5 | 5 | 5 | 3 | 3 | 3 | 3 | 4 | 4 | 4 | 4 | 4 | 4 | 4 | 4 | 4 | 5 | 4 | 5 | 5 | 5 | 5 | 5 |   |
| 300 | 4 | 4 | 5 | 4 | 5 | 5 | 5 | 5 | 2 | 2 | 2 | 2 | 4 | 4 | 4 | 4 | 4 | 4 | 4 | 4 | 4 | 4 | 4 | 4 | 4 | 5 | 5 | 5 | 5 |
| 301 | 4 | 5 | 4 | 4 | 5 | 5 | 5 | 5 | 2 | 2 | 2 | 2 | 4 | 4 | 4 | 4 | 4 | 4 | 4 | 4 | 3 | 4 | 4 | 4 | 5 | 5 | 5 | 5 |   |
| 302 | 4 | 5 | 4 | 4 | 5 | 5 | 5 | 5 | 2 | 2 | 2 | 2 | 4 | 4 | 4 | 4 | 4 | 4 | 4 | 4 | 4 | 3 | 4 | 3 | 5 | 5 | 5 | 5 |   |
| 303 | 4 | 4 | 5 | 4 | 5 | 5 | 5 | 5 | 2 | 2 | 2 | 2 | 4 | 4 | 4 | 4 | 4 | 4 | 4 | 4 | 3 | 4 | 5 | 4 | 5 | 5 | 5 | 5 |   |
| 304 | 4 | 5 | 4 | 4 | 5 | 5 | 5 | 5 | 2 | 2 | 2 | 2 | 4 | 4 | 4 | 4 | 4 | 4 | 4 | 4 | 4 | 5 | 3 | 5 | 4 | 4 | 4 | 4 |   |
| 305 | 4 | 5 | 4 | 4 | 5 | 5 | 5 | 5 | 2 | 2 | 2 | 2 | 4 | 4 | 4 | 4 | 4 | 4 | 4 | 4 | 3 | 4 | 5 | 4 | 4 | 4 | 5 | 4 |   |
| 306 | 4 | 4 | 5 | 4 | 5 | 5 | 5 | 5 | 2 | 2 | 2 | 2 | 4 | 4 | 4 | 4 | 4 | 4 | 4 | 4 | 5 | 4 | 4 | 4 | 5 | 5 | 5 | 5 |   |
| 307 | 4 | 5 | 4 | 4 | 5 | 5 | 5 | 5 | 2 | 2 | 2 | 2 | 4 | 4 | 4 | 4 | 4 | 4 | 4 | 4 | 4 | 5 | 4 | 5 | 5 | 5 | 5 | 5 |   |
| 308 | 4 | 5 | 4 | 4 | 5 | 5 | 5 | 5 | 2 | 2 | 2 | 2 | 4 | 4 | 4 | 4 | 4 | 4 | 4 | 4 | 4 | 4 | 5 | 4 | 5 | 5 | 5 | 5 |   |
| 309 | 5 | 4 | 4 | 4 | 5 | 5 | 5 | 5 | 2 | 1 | 1 | 1 | 4 | 4 | 4 | 4 | 4 | 4 | 4 | 4 | 4 | 5 | 4 | 5 | 5 | 5 | 5 | 5 |   |
| 310 | 4 | 5 | 4 | 4 | 5 | 5 | 5 | 5 | 1 | 1 | 1 | 1 | 4 | 4 | 4 | 4 | 4 | 4 | 4 | 4 | 4 | 4 | 5 | 4 | 5 | 5 | 5 | 5 |   |
| 311 | 4 | 4 | 5 | 4 | 5 | 5 | 5 | 5 | 1 | 1 | 1 | 1 | 4 | 4 | 4 | 4 | 4 | 4 | 4 | 4 | 4 | 5 | 4 | 5 | 5 | 5 | 5 | 5 |   |
| 312 | 4 | 5 | 4 | 4 | 5 | 5 | 5 | 5 | 2 | 2 | 2 | 2 | 4 | 4 | 4 | 4 | 4 | 4 | 4 | 4 | 4 | 4 | 4 | 4 | 4 | 4 | 4 | 4 |   |
| 313 | 4 | 4 | 5 | 4 | 5 | 4 | 4 | 3 | 4 | 4 | 4 | 4 | 4 | 4 | 4 | 4 | 4 | 4 | 4 | 4 | 4 | 4 | 5 | 4 | 3 | 3 | 3 | 3 |   |
| 314 | 4 | 5 | 4 | 4 | 3 | 4 | 4 | 5 | 4 | 4 | 5 | 5 | 4 | 4 | 4 | 4 | 4 | 4 | 4 | 4 | 4 | 5 | 4 | 5 | 3 | 3 | 3 | 3 |   |
| 315 | 4 | 4 | 5 | 4 | 5 | 4 | 4 | 3 | 5 | 5 | 5 | 5 | 4 | 4 | 4 | 4 | 4 | 3 | 4 | 5 | 4 | 4 | 5 | 4 | 3 | 3 | 3 | 3 |   |
| 316 | 4 | 4 | 4 | 4 | 5 | 5 | 5 | 5 | 2 | 2 | 2 | 2 | 4 | 4 | 4 | 3 | 4 | 5 | 4 | 4 | 4 | 5 | 4 | 5 | 4 | 4 | 4 | 4 |   |
| 317 | 4 | 4 | 4 | 4 | 5 | 5 | 5 | 5 | 2 | 2 | 2 | 2 | 4 | 4 | 4 | 4 | 4 | 5 | 4 | 4 | 4 | 5 | 5 | 5 | 4 | 4 | 4 | 4 |   |
| 318 | 5 | 4 | 3 | 4 | 5 | 5 | 5 | 5 | 2 | 2 | 2 | 2 | 4 | 4 | 4 | 4 | 4 | 4 | 4 | 5 | 4 | 4 | 4 | 4 | 4 | 4 | 4 | 4 |   |
| 319 | 4 | 4 | 4 | 4 | 2 | 4 | 3 | 3 | 2 | 2 | 2 | 2 | 4 | 4 | 4 | 4 | 4 | 4 | 4 | 5 | 4 | 4 | 4 | 4 | 5 | 4 | 4 | 5 |   |
| 320 | 4 | 4 | 4 | 4 | 5 | 5 | 5 | 5 | 2 | 2 | 2 | 2 | 4 | 4 | 4 | 4 | 5 | 5 | 5 | 3 | 5 | 4 | 4 | 4 | 4 | 4 | 4 | 4 |   |
| 321 | 4 | 4 | 4 | 4 | 5 | 5 | 5 | 5 | 2 | 2 | 2 | 2 | 4 | 4 | 4 | 4 | 5 | 3 | 5 | 5 | 4 | 4 | 5 | 4 | 4 | 4 | 4 | 4 |   |
| 322 | 4 | 4 | 5 | 4 | 5 | 4 | 4 | 3 | 5 | 5 | 5 | 5 | 4 | 4 | 4 | 4 | 4 | 5 | 4 | 5 | 4 | 5 | 4 | 5 | 3 | 3 | 3 | 3 |   |
| 323 | 4 | 4 | 5 | 4 | 3 | 5 | 4 | 4 | 2 | 2 | 2 | 2 | 4 | 4 | 5 | 4 | 3 | 4 | 4 | 3 | 4 | 4 | 5 | 4 | 4 | 4 | 3 | 4 |   |
| 324 | 4 | 4 | 4 | 4 | 3 | 3 | 3 | 3 | 2 | 2 | 2 | 2 | 4 | 4 | 5 | 4 | 5 | 4 | 5 | 5 | 4 | 5 | 4 | 5 | 4 | 4 | 4 | 4 |   |
| 325 | 5 | 4 | 4 | 3 | 3 | 3 | 3 | 3 | 2 | 2 | 2 | 2 | 4 | 4 | 5 | 4 | 5 | 5 | 5 | 4 | 4 | 5 | 4 | 5 | 4 | 4 | 5 | 4 |   |
| 326 | 5 | 4 | 4 | 4 | 3 | 3 | 3 | 3 | 2 | 2 | 2 | 2 | 4 | 4 | 5 | 4 | 5 | 4 | 5 | 5 | 5 | 5 | 4 | 4 | 4 | 5 | 5 | 5 | 3 |
| 327 | 4 | 5 | 4 | 4 | 3 | 3 | 3 | 3 | 2 | 2 | 2 | 2 | 4 | 4 | 5 | 4 | 5 | 4 | 5 | 5 | 5 | 5 | 5 | 4 | 5 | 4 | 4 | 4 | 4 |
| 328 | 4 | 4 | 4 | 4 | 3 | 3 | 3 | 3 | 2 | 2 | 2 | 2 | 4 | 4 | 5 | 4 | 5 | 4 | 5 | 5 | 5 | 5 | 4 | 4 | 4 | 4 | 4 | 4 |   |
| 329 | 4 | 4 | 4 | 4 | 3 | 3 | 3 | 3 | 2 | 2 | 2 | 2 | 4 | 4 | 5 | 4 | 5 | 5 | 5 | 5 | 4 | 5 | 4 | 4 | 4 | 4 | 4 | 4 |   |
| 330 | 3 | 4 | 3 | 3 | 3 | 3 | 3 | 3 | 2 | 2 | 2 | 2 | 5 | 4 | 4 | 4 | 5 | 5 | 5 | 5 | 5 | 4 | 4 | 4 | 4 | 4 | 4 | 4 |   |
| 331 | 3 | 4 | 4 | 4 | 3 | 3 | 3 | 4 | 2 | 2 | 2 | 2 | 4 | 4 | 5 | 4 | 5 | 5 | 5 | 5 | 5 | 5 | 4 | 4 | 4 | 4 | 4 | 4 |   |
| 332 | 4 | 4 | 3 | 4 | 4 | 2 | 4 | 4 | 2 | 2 | 2 | 2 | 4 | 4 | 5 | 4 | 5 | 5 | 5 | 5 | 5 | 4 | 5 | 4 | 5 | 4 | 4 | 4 |   |
| 333 | 4 | 4 | 5 | 4 | 4 | 4 | 4 | 3 | 2 | 2 | 2 | 2 | 4 | 4 | 5 | 4 | 5 | 5 | 5 | 5 | 5 | 4 | 4 | 5 | 4 | 4 | 4 | 4 |   |
| 334 | 4 | 5 | 4 | 4 | 4 | 3 | 4 | 4 | 2 | 2 | 2 | 2 | 4 | 4 | 5 | 4 | 5 | 5 | 5 | 5 | 5 | 3 | 4 | 5 | 4 | 4 | 4 | 4 |   |
| 335 | 4 | 5 | 4 | 4 | 4 | 4 | 4 | 3 | 2 | 2 | 2 | 2 | 4 | 4 | 5 | 4 | 5 | 5 | 5 | 5 | 5 | 4 | 4 | 5 | 4 | 4 | 4 | 4 |   |
| 336 | 4 | 5 | 4 | 4 | 5 | 5 | 5 | 5 | 2 | 2 | 2 | 2 | 4 | 4 | 4 | 4 | 5 | 5 | 5 | 5 | 5 | 4 | 4 | 5 | 4 | 5 | 5 | 5 | 5 |
| 337 | 4 | 4 | 5 | 4 | 4 | 4 | 4 | 4 | 2 | 2 | 2 | 2 | 4 | 4 | 5 | 4 | 5 | 5 | 5 | 5 | 5 | 4 | 5 | 4 | 5 | 5 | 5 | 5 | 5 |
| 338 | 4 | 5 | 4 | 4 | 4 | 4 | 4 | 4 | 1 | 1 | 1 | 1 | 4 | 4 | 5 | 4 | 5 | 5 | 5 | 5 | 5 | 5 | 4 | 4 | 4 | 5 | 5 | 5 | 5 |
| 339 | 4 | 4 | 5 | 4 | 4 | 4 | 4 | 4 | 1 | 1 | 1 | 1 | 4 | 4 | 5 | 4 | 5 | 5 | 5 | 5 | 5 | 4 | 4 | 4 | 4 | 5 | 5 | 5 | 5 |
| 340 | 4 | 4 | 5 | 4 | 4 | 4 | 4 | 4 | 1 | 1 | 1 | 1 | 4 | 4 | 5 | 4 | 5 | 5 | 5 | 5 | 5 | 5 | 4 | 4 | 4 | 5 | 5 | 5 | 5 |
| 341 | 4 | 5 | 4 | 4 | 4 | 4 | 4 | 4 | 1 | 1 | 1 | 1 | 4 | 4 | 5 | 4 | 5 | 5 | 5 | 5 | 5 | 4 | 5 | 4 | 5 | 5 | 5 | 5 | 5 |
| 342 | 4 | 4 | 5 | 4 | 4 | 4 | 4 | 4 | 2 | 2 | 2 | 2 | 4 | 4 | 5 | 4 | 5 | 5 | 5 | 5 | 5 | 4 | 4 | 5 | 4 | 4 | 4 | 4 | 4 |
| 343 | 5 | 4 | 4 | 4 | 4 | 4 | 4 | 4 | 2 | 2 | 2 | 2 | 4 | 4 | 5 | 4 | 3 | 3 | 3 | 3 | 3 | 4 | 4 | 5 | 4 | 4 | 4 | 4 | 4 |
| 344 | 4 | 4 | 5 | 4 | 4 | 4 | 4 |   |   |   |   |   |   |   |   |   |   |   |   |   |   |   |   |   |   |   |   |   |   |

|     |   |   |   |   |   |   |   |   |   |   |   |   |   |   |   |   |   |   |   |   |   |   |   |   |   |   |   |   |
|-----|---|---|---|---|---|---|---|---|---|---|---|---|---|---|---|---|---|---|---|---|---|---|---|---|---|---|---|---|
| 345 | 4 | 4 | 4 | 5 | 4 | 4 | 4 | 4 | 2 | 2 | 2 | 2 | 4 | 4 | 5 | 4 | 5 | 5 | 5 | 5 | 4 | 4 | 5 | 4 | 4 | 5 | 4 | 4 |
| 346 | 4 | 5 | 4 | 4 | 4 | 4 | 4 | 4 | 1 | 1 | 1 | 1 | 4 | 4 | 4 | 4 | 5 | 5 | 5 | 5 | 4 | 4 | 5 | 4 | 5 | 5 | 5 | 5 |
| 347 | 4 | 5 | 4 | 4 | 4 | 4 | 4 | 4 | 1 | 1 | 1 | 1 | 3 | 5 | 4 | 4 | 5 | 5 | 5 | 5 | 4 | 4 | 5 | 4 | 5 | 5 | 5 | 5 |
| 348 | 4 | 4 | 5 | 4 | 4 | 4 | 4 | 4 | 2 | 2 | 2 | 2 | 4 | 4 | 5 | 4 | 4 | 4 | 4 | 4 | 4 | 4 | 5 | 4 | 4 | 4 | 4 |   |
| 349 | 4 | 4 | 5 | 4 | 4 | 4 | 5 | 5 | 4 | 2 | 2 | 2 | 4 | 4 | 5 | 4 | 4 | 4 | 4 | 4 | 4 | 4 | 5 | 4 | 5 | 4 | 5 |   |
| 350 | 4 | 5 | 4 | 4 | 4 | 4 | 4 | 4 | 2 | 2 | 2 | 2 | 4 | 4 | 4 | 4 | 5 | 4 | 5 | 5 | 5 | 4 | 4 | 4 | 4 | 4 | 5 |   |
| 351 | 4 | 4 | 5 | 4 | 4 | 4 | 4 | 4 | 2 | 2 | 2 | 2 | 4 | 4 | 5 | 4 | 5 | 5 | 5 | 5 | 4 | 4 | 4 | 4 | 4 | 5 | 4 |   |
| 352 | 5 | 4 | 4 | 4 | 4 | 4 | 4 | 4 | 2 | 2 | 2 | 1 | 4 | 4 | 5 | 4 | 2 | 4 | 2 | 2 | 5 | 4 | 4 | 4 | 4 | 5 | 5 |   |
| 353 | 4 | 4 | 5 | 4 | 4 | 4 | 4 | 4 | 1 | 2 | 2 | 2 | 4 | 4 | 5 | 4 | 4 | 4 | 4 | 4 | 4 | 4 | 5 | 4 | 4 | 5 | 4 |   |
| 354 | 4 | 4 | 5 | 4 | 4 | 4 | 4 | 4 | 2 | 2 | 2 | 1 | 4 | 4 | 5 | 4 | 4 | 4 | 4 | 4 | 4 | 5 | 4 | 5 | 4 | 5 | 5 |   |
| 355 | 4 | 5 | 4 | 4 | 4 | 4 | 4 | 4 | 2 | 2 | 2 | 1 | 4 | 4 | 5 | 4 | 4 | 4 | 4 | 4 | 4 | 5 | 4 | 5 | 4 | 5 | 4 |   |
| 356 | 5 | 4 | 4 | 4 | 4 | 4 | 4 | 4 | 2 | 2 | 2 | 1 | 4 | 5 | 4 | 4 | 4 | 4 | 4 | 4 | 4 | 4 | 5 | 4 | 4 | 5 | 4 |   |
| 357 | 4 | 5 | 4 | 4 | 4 | 4 | 4 | 4 | 1 | 1 | 1 | 3 | 4 | 4 | 5 | 4 | 4 | 4 | 4 | 4 | 4 | 4 | 5 | 4 | 4 | 4 | 4 |   |
| 358 | 5 | 3 | 5 | 4 | 4 | 4 | 4 | 4 | 1 | 2 | 1 | 1 | 4 | 4 | 5 | 4 | 4 | 4 | 4 | 4 | 4 | 4 | 4 | 4 | 4 | 4 | 4 |   |
| 359 | 4 | 4 | 5 | 4 | 5 | 4 | 4 | 4 | 4 | 4 | 4 | 4 | 4 | 4 | 5 | 4 | 4 | 4 | 4 | 4 | 4 | 5 | 4 | 5 | 3 | 4 | 4 |   |
| 360 | 4 | 5 | 4 | 4 | 4 | 4 | 4 | 5 | 1 | 1 | 1 | 2 | 5 | 4 | 4 | 4 | 4 | 4 | 4 | 4 | 4 | 5 | 4 | 5 | 4 | 4 | 4 |   |
| 361 | 4 | 4 | 5 | 4 | 4 | 4 | 4 | 5 | 1 | 1 | 1 | 2 | 4 | 4 | 4 | 4 | 4 | 4 | 4 | 4 | 4 | 4 | 5 | 4 | 5 | 5 | 5 |   |
| 362 | 4 | 4 | 5 | 4 | 4 | 4 | 4 | 5 | 1 | 1 | 1 | 1 | 4 | 4 | 4 | 4 | 4 | 4 | 4 | 4 | 4 | 4 | 5 | 4 | 5 | 5 | 5 |   |
| 363 | 4 | 4 | 5 | 4 | 5 | 5 | 5 | 4 | 1 | 2 | 1 | 1 | 4 | 4 | 4 | 4 | 4 | 4 | 4 | 4 | 4 | 4 | 4 | 4 | 5 | 5 | 5 |   |
| 364 | 4 | 5 | 4 | 4 | 5 | 5 | 5 | 4 | 1 | 1 | 1 | 1 | 4 | 4 | 5 | 4 | 4 | 4 | 4 | 4 | 4 | 4 | 5 | 4 | 5 | 5 | 5 |   |
| 365 | 4 | 5 | 4 | 4 | 5 | 5 | 5 | 4 | 1 | 1 | 1 | 1 | 4 | 4 | 3 | 5 | 4 | 4 | 4 | 4 | 4 | 4 | 5 | 4 | 4 | 5 | 4 |   |
| 366 | 4 | 5 | 4 | 4 | 5 | 5 | 5 | 5 | 2 | 1 | 1 | 1 | 4 | 4 | 5 | 4 | 4 | 4 | 4 | 4 | 4 | 5 | 4 | 5 | 5 | 5 | 5 |   |
| 367 | 3 | 5 | 5 | 4 | 3 | 3 | 3 | 3 | 2 | 3 | 3 | 4 | 4 | 4 | 4 | 4 | 4 | 4 | 4 | 5 | 4 | 5 | 5 | 5 | 3 | 4 | 5 |   |
| 368 | 4 | 4 | 5 | 4 | 4 | 4 | 4 | 4 | 4 | 4 | 4 | 4 | 4 | 4 | 5 | 4 | 4 | 2 | 4 | 4 | 4 | 4 | 4 | 4 | 3 | 3 | 4 |   |
| 369 | 4 | 5 | 4 | 4 | 4 | 4 | 4 | 4 | 4 | 4 | 4 | 4 | 4 | 4 | 5 | 4 | 3 | 3 | 5 | 3 | 4 | 4 | 5 | 4 | 3 | 4 | 3 |   |
| 370 | 4 | 5 | 4 | 4 | 5 | 3 | 3 | 5 | 2 | 2 | 1 | 3 | 3 | 4 | 5 | 5 | 5 | 4 | 5 | 5 | 4 | 4 | 5 | 4 | 5 | 4 | 5 |   |
| 371 | 4 | 4 | 5 | 4 | 5 | 5 | 5 | 5 | 3 | 3 | 3 | 3 | 4 | 4 | 5 | 4 | 5 | 5 | 5 | 5 | 4 | 5 | 4 | 5 | 5 | 4 | 5 |   |
| 372 | 5 | 4 | 4 | 4 | 3 | 3 | 3 | 3 | 1 | 1 | 1 | 1 | 4 | 4 | 5 | 4 | 5 | 5 | 5 | 5 | 4 | 5 | 4 | 5 | 4 | 4 | 4 |   |
| 373 | 4 | 4 | 5 | 4 | 3 | 3 | 3 | 3 | 1 | 2 | 2 | 3 | 4 | 4 | 5 | 4 | 5 | 5 | 5 | 5 | 4 | 4 | 5 | 4 | 5 | 5 | 4 |   |
| 374 | 4 | 5 | 4 | 4 | 5 | 5 | 5 | 5 | 3 | 3 | 3 | 3 | 4 | 4 | 5 | 4 | 5 | 5 | 5 | 5 | 4 | 4 | 5 | 4 | 5 | 4 | 5 |   |
| 375 | 4 | 5 | 4 | 4 | 5 | 5 | 5 | 5 | 3 | 2 | 2 | 2 | 4 | 4 | 5 | 4 | 5 | 5 | 5 | 5 | 4 | 4 | 5 | 4 | 4 | 5 | 5 |   |
| 376 | 5 | 4 | 4 | 4 | 5 | 5 | 5 | 5 | 1 | 1 | 1 | 1 | 4 | 5 | 4 | 4 | 5 | 5 | 5 | 5 | 5 | 5 | 4 | 5 | 5 | 5 | 5 |   |
| 377 | 4 | 5 | 4 | 4 | 5 | 5 | 5 | 5 | 1 | 1 | 1 | 1 | 4 | 4 | 5 | 4 | 5 | 5 | 5 | 5 | 4 | 5 | 4 | 5 | 5 | 5 | 5 |   |
| 378 | 4 | 4 | 5 | 4 | 2 | 2 | 2 | 2 | 1 | 1 | 1 | 1 | 3 | 4 | 5 | 5 | 4 | 4 | 4 | 3 | 4 | 4 | 5 | 4 | 5 | 5 | 5 |   |
| 379 | 4 | 4 | 4 | 5 | 3 | 3 | 3 | 3 | 3 | 3 | 3 | 3 | 4 | 4 | 5 | 5 | 4 | 4 | 4 | 4 | 4 | 5 | 5 | 5 | 4 | 5 | 5 |   |
| 380 | 4 | 4 | 5 | 4 | 3 | 3 | 3 | 3 | 3 | 3 | 3 | 3 | 4 | 4 | 5 | 4 | 5 | 4 | 5 | 4 | 4 | 4 | 5 | 4 | 5 | 5 | 4 |   |
| 381 | 4 | 4 | 5 | 4 | 4 | 4 | 3 | 4 | 3 | 2 | 2 | 1 | 5 | 4 | 4 | 5 | 5 | 3 | 5 | 5 | 5 | 4 | 5 | 4 | 4 | 5 | 4 |   |
| 382 | 4 | 4 | 5 | 4 | 4 | 4 | 4 | 4 | 4 | 4 | 4 | 4 | 4 | 4 | 5 | 4 | 5 | 5 | 5 | 5 | 3 | 4 | 5 | 4 | 5 | 4 | 5 |   |
| 383 | 4 | 5 | 4 | 4 | 4 | 4 | 4 | 4 | 2 | 2 | 1 | 3 | 4 | 4 | 5 | 4 | 4 | 4 | 4 | 3 | 5 | 4 | 4 | 4 | 4 | 4 | 5 |   |
| 384 | 4 | 5 | 4 | 4 | 4 | 4 | 4 | 4 | 2 | 2 | 2 | 3 | 4 | 5 | 4 | 5 | 4 | 3 | 4 | 4 | 4 | 4 | 5 | 4 | 4 | 5 | 5 |   |
| 385 | 4 | 5 | 4 | 5 | 4 | 4 | 4 | 4 | 1 | 2 | 2 | 3 | 5 | 5 | 4 | 4 | 3 | 5 | 3 | 4 | 4 | 4 | 5 | 4 | 4 | 5 | 5 |   |
| 386 | 4 | 4 | 5 | 5 | 4 | 4 | 4 | 4 | 3 | 2 | 2 | 1 | 4 | 5 | 5 | 4 | 4 | 4 | 4 | 4 | 4 | 5 | 4 | 5 | 5 | 4 | 5 |   |
| 387 | 5 | 4 | 5 | 5 | 4 | 4 | 4 | 4 | 3 | 3 | 3 | 3 | 5 | 4 | 4 | 5 | 4 | 4 | 4 | 4 | 4 | 5 | 5 | 5 | 4 | 5 | 5 |   |
| 388 | 5 | 5 | 4 | 5 | 4 | 4 | 4 | 4 | 2 | 2 | 1 | 3 | 5 | 5 | 4 | 4 | 3 | 3 | 3 | 4 | 5 | 5 | 5 | 5 | 4 | 4 | 5 |   |
| 389 | 4 | 5 | 4 | 5 | 4 | 4 | 4 | 4 | 2 | 2 | 2 | 2 | 4 | 4 | 5 | 4 | 3 | 5 | 3 | 3 | 5 | 5 | 5 | 5 | 4 | 5 | 4 |   |
| 390 | 5 | 5 | 4 | 4 | 4 | 4 | 4 | 4 | 4 | 5 | 4 | 3 | 5 | 4 | 4 | 4 | 4 | 2 | 3 | 3 | 5 | 5 | 5 | 5 | 3 | 5 | 4 |   |
| 391 | 5 | 5 | 4 | 5 | 4 | 4 | 4 | 4 | 2 | 2 | 2 | 2 | 4 | 4 | 4 | 4 | 3 | 5 | 3 | 3 | 5 | 5 | 5 | 5 | 4 | 4 | 5 |   |
| 392 | 4 | 5 | 4 | 5 | 4 | 4 | 4 | 4 | 3 | 3 | 3 | 1 | 4 | 5 | 4 | 5 | 4 | 3 | 4 | 4 | 5 | 5 | 5 | 5 | 4 | 3 | 5 |   |
| 393 | 4 | 5 | 5 | 4 | 4 | 4 | 4 | 4 | 1 | 1 | 4 | 1 | 5 | 4 | 5 | 4 | 4 | 5 | 5 | 5 | 5 | 5 | 4 | 4 | 5 | 5 | 5 |   |
| 394 | 4 | 5 | 4 | 5 | 4 | 4 | 4 | 4 | 2 | 2 | 3 | 2 | 4 | 4 | 5 | 4 | 4 | 3 | 4 | 4 | 4 | 5 | 5 | 4 | 4 | 5 | 5 |   |
| 395 | 5 | 4 | 5 | 5 | 4 | 4 | 4 | 4 | 2 | 2 | 3 | 2 | 4 | 5 | 4 | 4 | 4 | 4 | 4 | 3 | 4 | 5 | 5 | 4 | 4 | 4 | 4 |   |
| 396 | 5 | 4 | 5 | 4 | 4 | 4 | 4 | 4 | 2 | 2 | 2 | 3 | 4 | 5 | 4 | 4 | 4 | 4 | 4 | 4 | 4 | 5 | 4 | 5 | 4 | 5 | 5 |   |
| 397 | 5 | 5 | 4 | 5 | 4 | 4 | 4 | 5 | 2 | 2 | 2 | 2 | 4 | 4 | 5 | 4 | 4 | 4 | 4 | 4 | 4 | 5 | 5 | 4 | 4 | 4 | 5 |   |
| 398 | 5 | 4 | 5 | 5 | 4 | 4 | 4 | 5 | 2 | 2 | 2 | 2 | 5 | 5 | 5 | 4 | 4 | 4 | 4 | 4 | 4 | 5 | 5 | 4 | 4 | 5 | 4 |   |
| 399 | 5 | 5 | 4 | 4 | 5 | 5 | 5 | 4 | 1 | 1 | 1 | 1 | 5 | 4 | 4 | 4 | 4 | 4 | 4 | 4 | 4 | 5 | 5 | 5 | 5 | 5 | 5 |   |
| 400 | 5 | 5 | 4 | 5 | 5 | 5 | 5 | 4 | 1 | 1 | 1 | 1 | 4 | 5 | 4 | 5 | 3 | 5 | 3 | 5 | 5 | 5 | 5 | 4 | 5 | 5 | 5 |   |
| 401 | 4 | 5 | 5 | 5 | 5 | 5 | 5 | 5 | 1 | 1 | 1 | 1 | 4 | 5 | 5 | 5 | 4 | 4 | 4 | 4 | 4 | 5 | 4 | 5 | 5 | 5 | 5 |   |
| 402 | 5 | 4 | 5 | 4 | 3 | 3 | 3 | 3 | 2 | 2 | 2 | 2 | 4 | 5 | 4 | 4 | 4 | 4 | 4 | 4 | 4 | 5 | 5 | 5 | 4 | 5 | 5 |   |
| 403 | 5 | 5 | 4 | 5 | 3 | 5 | 4 | 4 | 2 | 2 | 2 | 2 | 5 | 5 | 4 | 5 | 4 | 4 | 4 | 4 | 4 | 5 | 5 | 5 | 4 | 5 | 5 |   |
| 404 | 5 | 4 | 5 | 5 | 3 | 3 | 3 | 3 | 2 | 2 | 2 | 2 | 5 | 5 | 5 | 4 | 4 | 4 | 4 | 4 | 4 | 5 | 5 | 5 | 4 | 4 | 4 |   |
| 405 | 5 | 5 | 5 | 5 | 4 | 4 | 4 | 3 | 2 | 2 | 2 | 2 | 4 | 5 | 5 | 5 | 4 | 3 | 4 | 5 | 4 | 5 | 4 | 5 | 4 | 5 | 4 |   |
| 406 | 5 | 4 | 5 | 5 | 4 | 4 | 4 | 4 | 2 | 2 | 2 | 2 | 5 | 5 | 3 | 5 | 4 | 4 | 4 | 4 | 4 | 5 | 5 | 5 | 5 | 4 | 5 |   |
| 407 | 5 | 5 | 5 | 4 | 4 | 4 | 4 | 4 | 3 | 3 | 3 | 3 | 4 | 4 | 5 | 5 | 4 | 4 | 4 | 4 | 4 | 5 | 5 | 4 | 5 | 5 | 4 |   |
| 408 | 4 | 5 | 5 | 5 | 4 | 5 | 4 | 5 | 4 | 2 | 3 | 3 | 5 | 5 | 5 | 5 | 4 | 4 | 4 | 4 | 4 | 5 | 5 | 5 | 4 | 5 | 5 |   |
| 409 | 5 | 4 | 5 | 5 | 4 | 4 | 4 | 4 | 3 | 3 | 3 | 3 | 4 | 4 | 5 | 5 | 4 | 4 | 4 | 4 | 4 | 5 | 5 | 5 | 5 | 5 | 4 |   |
| 410 | 5 | 5 | 4 | 5 | 4 | 4 | 4 | 4 | 3 | 3 | 3 | 3 | 5 | 5 | 4 | 4 | 4 | 4 | 4 | 4 | 5 | 5 | 4 | 5 | 3 | 5 | 4 |   |
| 411 | 4 | 5 | 5 | 5 | 4 | 4 | 4 | 4 | 2 | 2 | 2 | 2 | 5 | 4 | 4 | 5 | 4 | 5 | 4 | 4 | 4 | 5 | 5 | 5 | 4 | 5 | 4 |   |
| 412 | 4 | 5 | 5 | 5 | 4 | 4 | 4 | 4 | 2 | 2 | 2 | 2 | 5 | 5 | 4 | 5 | 4 | 4 | 4 | 4 | 5 | 5 | 4 | 4 | 4 | 4 | 4 |   |
| 413 | 4 | 5 | 5 | 5 | 4 | 4 | 4 | 4 | 2 | 2 | 2 | 2 | 4 | 5 | 4 | 5 | 4 | 5 | 4 | 5 | 4 | 5 | 5 | 4 | 5 | 4 | 4 |   |

|     |   |   |   |   |   |   |   |   |   |   |   |   |   |   |   |   |   |   |   |   |   |   |   |   |   |   |   |   |
|-----|---|---|---|---|---|---|---|---|---|---|---|---|---|---|---|---|---|---|---|---|---|---|---|---|---|---|---|---|
| 414 | 5 | 5 | 5 | 5 | 4 | 4 | 4 | 4 | 2 | 2 | 2 | 2 | 5 | 5 | 5 | 4 | 4 | 5 | 4 | 4 | 5 | 5 | 5 | 5 | 5 | 5 | 5 | 5 |
| 415 | 4 | 5 | 5 | 5 | 4 | 4 | 4 | 4 | 2 | 2 | 2 | 2 | 5 | 5 | 4 | 5 | 5 | 3 | 5 | 5 | 5 | 5 | 5 | 5 | 4 | 4 | 4 | 4 |
